# Supplementary material for: Framework of the Alu Subfamily Evolution in the Platyrrhine Three-Family Clade of Cebidae, Callithrichidae, and Aotidae
Source: MDPI journal article supplement (doi:10.3390/genes14020249), 2023-01-18
Supplement: s1 [file s1]

```

>AluSx_sf0 count=9363 pvalue=5e-2242 ( parent_pvalue=5e-2242 ) Linup-
refined
GGCCGGGCGCGGTGGCTCACGCCTGTAATCCCAGCACTTTGGGAGGCCGAGGCGGGCGGATCACCTGAGGTCA
GGAGTTCGAGACCAGCCTGGCCAACATGGTGAAACCCCGTCTCTACTAAAAATACAAAAATTAGCCGGGCGTG
GTGGCGCGCCTGTAATCCCAGCTACTCGGGAGGCTGAGGCAGGAGAATCGCTTGAACCCGGGAGGCGGAGG
TTGCAGTGAGCCGAGATCGCGCCACTGCACTCCAGCCTGGGCGACAGAGCGAGACTCCGTCTCAAAAAA
>AluTa15_sf1 + 49 count=10760 pvalue=6e-4269 ( parent_pvalue=5e-2242 )
parent=0 muts= 85:g/t 75:t/a Linup-refined
GGCCGGGCGCGGTGGCTCACGCCTGTAATCCCAGCACTTTGGGAGGCCGAGGCGGGTGGATCACGAGGTCAAG
AGATCGAGACCATCCTGGTCAACATGGTGAAACCCCGTCTCTACTAAAAATACAAAAAATTAGCTGGGCATGG
TGGCGCGTGCCTGTAATCCCAGCTACTCAGGAGGCTGAGGCAGGAGAATTGCCTGAACCCAGGAGGCGGAGGT
TGCGGTGAGCCGAGATCGCGCCATTGCACTCCAGCCTGGGTAACAAGAGCGAAACTCCGTCTCAAAAAA
>sf2 count=631 pvalue=6e-158 ( parent_pvalue=5e-2242 ) parent=0 muts=
192:a/g 91:c/g Linup-refined
GGCCGGGCGCGGTGGCTCACGCCTGTAATCCCAGCACTTTGGGAGGCCGAGGCGGGAGGATCGCTTGAGCCCA
GGAGTTCGAGACCAGCCTGGGCAACATAGCGAGACCCCGTCTCTACAAAAAATACAAAAAATTAGCCGGGCGT
GGTGGCGCGCCTGTAGTCCCAGCTACTCGGGAGGCTGAGGCGGGAGGATCGCTTGAGCCCGGGAGGTTCGAG
GCTGCAGTGAGCTGTGATCGCGCCACTGCACTCCAGCCTGGGCGACAGAGCGAGACCCTGTCTCAAAAAA
>sf3 count=5992 pvalue=4e-6183 ( parent_pvalue=6e-4269 ) parent=1 muts=
265:g/c 253:c/t Linup-refined
GGCCGGGCGCGGTGGCTCACGCCTGTAATCCCAGCACTTTGGGAGGCCGAGGCGGGCGGATCACGAGGTCAAG
AGATCGAGACCATCCTGGCCAACATGGTGAAACCCCGTCTCTACTAAAAATACAAAAAATTAGCTGGGCGTGGT
GGCGCGCCTGTAGTCCCAGCTACTCGGGAGGCTGAGGCAGGAGAATCGCTTGAACCCGGGAGGCGGAGGTT
GCAGTGAGCCGAGATCGCGCCACTGCACTCCAGCCTGGGCGACAGAGCGAGACTCCGTCTCAAAAAA
>sf4 count=588 pvalue=1e-260 ( parent_pvalue=6e-4269 ) parent=1 muts=
209:a/g 72:g/c Linup-refined
GGCCGGGCGCGGTGGCTCAAGCCTGTAATCCCAGCACTTTGGGAGGCCGAGGCGGGTGGATCACGAGGTCAAC
AGATCGAGACCATCCTGGTCAACATGGTGAAACCCCGTCTCTACTAAAAATTACAAAAAATTAGCTGGGCACG
GTGGCGCGTGCTGTAATCCCAGCTACTCAGGAGGCTGAGGCAGGAGAATTGCCTGAACCCAGGGGGCGGAGG
TTGCGGTGAGCCGAGATCGCGCCATTGCACTCCAGCCTGGGTAACAAGAGCGAAACTCCGTCTCAAAAAA
>sf5 count=189 pvalue=1e-119 ( parent_pvalue=6e-4269 ) parent=1 muts=
170:a/g 87:c/t Linup-refined
GGCCGGGCGCGGTGGCTCAAGCCTGTAATCCCAGCACTTTGGGAGGCCGAGGCGGGTGGATCACGAGGTCAAC
AGATCGAGACCATCCTGGTCAACATGGTGAAACCCCGTCTCTACTAAAAATTACAAAAAATTAGCTGGGCACGG
TGGTGCGTGCCTGTAATCCCAGCTGCTCGGGAGGCTGAGGCAGGAGAATTGCCTGAACCCAGGAGGCGGAGAT
TGCGGTGAGCCGAGATCGCGCCATTGCACTCCAGCCTGGGTAACAAGAGCGAAACTCCGTCTCAAAAAA
>AluJr_sf6 + 20 count=1642 pvalue=6e-158 ( parent_pvalue=6e-158 )
parent=2 muts= 282:a/t 211:g/t Linup-refined
GGCCGGGCGCGGTGGCTCACGCCTGTAATCCCAGCACTTTGGGAGGCCGAGGCGGGAGGATCGCTTGAGGCCA
GGAGTTCGAGACCAGCCTGGGCAACATAGCGAGACCCCGTCTCTACAAAAAATATAAAAAAATTAGCCGGGCGT
GGTGGCGCGCCTGTAGTCCCAGCTACTCGGGAGGCTGAGGCGGGAGGATCGCTTGAGCCCAGGAGTTTCGAG
GCTGCAGTGAGCTATGATCGCGCCACTGCACTCCAGCCTGGGCGACAGAGCGAGACCCTGTCTCAAAAAA
>sf7 count=146 pvalue=4e-21 ( parent_pvalue=5e-2242 ) parent=0 muts=
188:g/c 101:g/a Linup-refined
AGCCGGGCGCGGTGGCTCACGCCTGTAATCCCAGCACTTTGGGAGGCCGAGGCGGGCAGATCACTTGAGGTCA
GGAGTTCGAGACCAGCCTGGCCAACATGGTGAAACCCCGTCTCTACTAAAAATACAAAAAATTAGCCAGGTGTG
GTGGTGACGCCTGTAATCCCAGCTACTCGGGAGGCTGAGGCACAAGAATCGCTTGAACCCGGGAGGCGGAGG
TTGCAGTGAGCCGAGATCGCGCCACTGCACTCCAGCCTGGGCGACAGAGCGAGACTCCGTCTCAAAAAA
>sf8 count=493 pvalue=2e-48 ( parent_pvalue=5e-2242 ) parent=0 muts=
145:g/a 117:t/- Linup-refined
GGCCGGGCGCGGTGGCTCACGCCTGTAATCCTAGCACTTTGGGAGGCCGAGGCGGGCGGATCACCTGAGGTCA
GGAGTTCGAGACCAGCCTGGCCAACATGGTGAAACCCCGTCTCTACTAAAAATACAAAAAATTAGCCGGGCGTG
GTGGCGCGCCTGTAATCCCAGCTACTCGGGAGGCTGAGGCAGGAGAATCGCTTGAACCCGGGAGGCGGAGG
TTGCAGTGAGCCGAGATCGCGCCACTGCACTCCAGCCTGGGCGAAAGAGCGAAACTCCGTCTCAAAAAA

```

```

>sf9 count=1242 pvalue=1e-5 ( parent_pvalue=5e-2242 ) parent=0 muts=
61:c/t 31:c/t Linup-refined
GGCCGGGCGCGGTGGCTCACGCCTGTAATCCCAGCACTTTGGGAGGCCGAGGCGGGCGGATCGCTTGAGCCCA
GGAGTTCGAGACCAGCCTGGGCAACATGGCGAAACCCCGTCTCTACAAAAATACAAAAATTAGCCGGGCGT
GGTGGCGCGCGCCTGTAGTCCCAGCTACTCGGGAGGCTGAGGTGGGAGGATCGCTTGAGCCCGGGAGGTGAG
GCTGCAGTGAGCCGTGATCGCGCCACTGCACTCCAGCCTGGGCGACAGAGCGAGACCCTGTCTCAAAAAA
>sf10 count=2609 pvalue=3e-1473 ( parent_pvalue=6e-4269 ) parent=1 muts=
265:g/c 253:c/t Linup-refined
GGCCGGGCGCGGTGGCTCACGCCTATAATCCCAGCACTTTGGGAGGCCGAGGCGGGTGGATCACGAGGTCAAG
AGATCGAGACCATCCTGGTCAACAAGGTGAAACCCCGTCTCTACTAAAAATACAAAAATTAGCTGGGCATGGT
GGCGCGCGCCTGTAGTCCCAGCTACTCGGGAGGCTGAGGCAGGAGAATTGCTTGAACCCAGGAGGCGGAGGTT
GCGGTGAGCCGAGATCGCGCCATTGCACTCCAGCCTGGGTAACAACAGCGAAACTCCGTCTCAAAAAA
>sf11 count=132 pvalue=2e-66 ( parent_pvalue=6e-4269 ) parent=1 muts=
88:t/a 51:g/a Linup-refined
GGCCGGGCGCGGTGGCTCACGCCTGTAATCCCAGCACTTTGGGAGGCCGAGACGGGTGGATCACGAGGTCAAG
AGATCGAGACCATCCAGGTCAACATGGTGAACCCCGTCTCTACTAAAAATACAAAAATTAGCTGGGCATGG
TGGCGCGTGCCTGTAATCCCAGCTACTCGGGAGGCTGAGGCAGGAGAATTGCCTGAGCCCAGGAGGCGGAGGT
TGCGGTGAGCCGAGATCGCGCCATTGCACTCCAGCCTGGGTAACAAGAGCGAAACTCCGTCTCAAAAAA
>sf12 count=164 pvalue=3e-83 ( parent_pvalue=4e-6183 ) parent=3 muts=
216:g/a 203:c/a Linup-refined
GGCCGGGCGCGGTGGCTCACGCCTGTAATCCCAGCACTTTGGGAGGCCGAGGCGGGCGGATCACGAGGTCAAG
AGATCGAGACCATCCTGGCCAACATGGTGAACCCCGTCTCTACTAAAAATACAAAAATTAGCCGGGCGTGG
TGGTGCCTGCCTGTAGTCCCAGCTACTCGGGAGGCTGAGGCAGGAGAATTGCTTGAACCCGGAACCGGAAGT
TGCAGTGAGCCGGGATCGCGCCACTGCACTCCAGCCTGGCGATAGAGCGAGACTCCGTCTCAAAAAA
>AluSq2_sf13 count=2987 pvalue=9e-1230 ( parent_pvalue=6e-4269 ) parent=1
muts= 234:t/a 185:g/a Linup-refined
GGCCGGGCGCGGTGGCTCACGCCTGTAATCCCAGCACTTTGGGAGGCCGAGGCGGGCGGATCACCTGAGGTCA
GGAGTTCGAGACCAGCCTGGCCAACATGGTGAACCCCGTCTCTACTAAAAATACAAAAATTAGCCGGGCGTGG
GTGGCGGGCGCCTGTAATCCCAGCTACTCGGGAGGCTGAGGCAGGAGAATCGCTTGAACCCGGGAGGCGGAGG
TTGCAGTGAGCCGAGATCGCGCCATTGCACTCCAGCCTGGGCGACAAGAGCGAAACTCCGTCTCAAAAAA
>sf14 count=453 pvalue=4e-48 ( parent_pvalue=9e-1230 ) parent=13 muts=
111:c/t 92:c/t Linup-refined
GGCCGGGCGCGGTGGCTCACGCCTGTAATCCCAGCACTTTGGGAGGCCGAGGCGGGCGGATCACCTGAGGTCA
GGAGTTCGAGACCAGCCTGGCCAACATGGTGAACCCCGTCTCTACTAAAAATACAAAAATTAGCCGGGCGTGG
GGTGGCGCGCGCCTGTAATCCCAGCTACTCGGGAGGCTGAGGCAGGAGAATCGCTTGAACCCGGGAGGCGGAG
GTTGCAGTGAGCCGAGATCGCGCCATTGCACTCCAGCCTGGGCAACAAGAGCGAAACTCCGTCTCAAAAAA
>sf15 + 31 count=4817 pvalue=6e-1473 ( parent_pvalue=4e-48 ) parent=14
muts= 100:t/a 90:g/a Linup-refined
GGCCGGGCGCGGTGGCTCACGCCTGTAATCCCAGCACTTTGGGAGGCCGAGGCGGGCGGATCACCTGAGGTGCG
GGAGTTCGAGACCAGCCTGACCAACATGGAGAAACCCCGTCTCTACTAAAAATACAAAAATTAGCCGGGCGTGG
TGGCGCATGCCTGTAATCCCAGCTACTCGGGAGGCTGAGGCAGGAGAATCGCTTGAACCCGGGAGGCGGAGGT
TGCGGTGAGCCGAGATCGCGCCATTGCACTCCAGCCTGGGCAACAAGAGCGAAACTCCGTCTCAAAAAA
>sf16 count=4343 pvalue=8e-89 ( parent_pvalue=9e-1230 ) parent=13 muts=
262:c/- 31:c/t Linup-refined
GGCCGGGCGCGGTGGCTCACGCCTGTAATCCCAGCACTTTGGGAGGCCGAGGCGGGCGGATCACCTGAGGTCA
GGAGTTCGAGACCAGCCTGGCCAACATGGTGAACCCCGTCTCTACTAAAAATACAAAAATTAGCCGGGCGTGG
GTGGCGGGCGCCTGTAATCCCAGCTACTCGGGAGGCTGAGGCAGGAGAATCGCTTGAACCCGGGAGGCGGAGG
TTGCAGTGAGCCGAGATCGCGCCACTGCACTCCAGCCTGGGCGACAAGAGCGAGACTCCGTCTCAAAAAA
>sf17 count=850 pvalue=2e-300 ( parent_pvalue=8e-89 ) parent=16 muts=
189:g/- 95:c/g Linup-refined
GGCCGGGCGCGGTGGCTCACGCCTGTAATCCCAGCACTTTGGGAGGCCGAGGCGGGTGGATCACGAGGTCAAG
AGTTCAAGACCAGCCTGGCCAAGATGGTGAACCCCGTCTCTACTAAAAATACAAAAATTAGCCGGGCGTGGT
GGCGGGCGCCTGTAATCCCAGCTACTCGGGAGGCTGAGGCAGGAGAATCGCTTGAACCCGGGAGGCGGAGGTTG
CAGTGAGCCGAGATCGCGCCACTGCACTCCAGCCTGGGCGACAGAGCGAGACTCCGTCTCAAAAAA

```

```
>sf18 count=158 pvalue=6e-101 ( parent_pvalue=5e-2242 ) parent=0 muts=
260:g/t 86:c/a Linup-refined
GGCCGGGCGCGGTGGCTCACGCCTGTAATCCAGCACTTTGGGAGGCCGAGGCGGGCGGATCACGAGGTCAGG
AGTTCAAGACCAGACTGGCCAACATGGTGAAACCCCGTCTCTACTAAAAAATACAAAAATTAGCTGGGCATGG
TGGCTCGTGCTGTAATCCAGCTACTTGGGAGGCTGAGGTAGGAGAATTGCTTGAACCCGGGAGGCGGAGGT
TGCAGTGAGCCGAGATCGCGCCACTGCACTCCAGCCTGGGCTACAGAGCGAGACTCCATCTCAAAAAA
>sf19 count=99 pvalue=7e-50 ( parent_pvalue=5e-2242 ) parent=0 muts=
145:g/a 117:t/- Linup-refined
GGCCGGGCGCGGTGGCTCACGCCTGTAATCCAGCACTTTGGGAGGCCGAGGCGGGCGGATCACCTGAGGTCA
GGAGTTCAAGACCAGCCTGGCCAACATGGTGAAACCCCGTCTCTACAAAAAATACAAAAATTAGCCGGGCATGA
TGGCGGGTGCTGTAATCCAGCTACTCGGAGGCTGAGGCGGGAGAATCGCTTGAACCCGGGAGGCGGAGGT
TGCAGTGAGCCGAGATCGCGCCATTGCACTCCAGCCTGGGCGACAGAGCGAGACTCCGTCTCAAAAAA
>sf21 count=297 pvalue=4e-54 ( parent_pvalue=6e-158 ) parent=6 muts=
67:g/c Linup-refined
GGCTGGGCGCAGTGGCTCACGCCTGTAATCCAGCACTTTGGGAGGCCGAGGCGGGAGGATCGCTTGAGCCCA
GGAGTTGAGACCAGCCTGGGCAACATAGCGAGACCCCGTCTCTACAAAAAATATAAAAAATTAGCCGGGCGT
GGTGGCGCGCGCTGTAGTCCAGCTACTCGGAGGCTGAGGCAGGAGGATCGCTTGAGCCCAGGAGTTTCGAG
GCTGCAGTGAGCTATGATCGCGCCACTGCACTCCAGCCTGGGCGACAGAGCGAGACCCTGTCTCAAAAAA
>sf22 count=1177 pvalue=8e-1433 ( parent_pvalue=1e-5 ) parent=9 muts=
103:a/g Linup-refined
GGCCGGGCGCGGTGGCTCACGCCTGTAATCCAGCACTTTGGGAGGCCGAGGCGGGAGGATCGCTTGAGCCCA
GGAGTTGAGACCAGCCTGGGCAACATAGCGAGACCCCGTCTCTACAAAAAATACAAAAATTAGCCGGGCGT
GGTGGCGCGCGCTGTAGTCCAGCTACTCGGAGGCTGAGGTGGGAGGATCGCTTGAGCCCAGGAGTTTCGAG
GCTGCAGTGAGCCGTGATCGCGCCACTGCACTCCAGCCTGGGCGACAGAGCGAGACCCTGTCTCAAAAAA
>sf23 count=1272 pvalue=3e-19 ( parent_pvalue=6e-158 ) parent=2 muts=
229:t/c Linup-refined
GGCCGGGCGCGGTGGCTCACGCCTGTAATCCAGCACTTTGGGAGGCCGAGGCGGGAGGATCGCTTGAGCCCA
GGAGTTGAGACCAGCCTGGGCAACATAGCGAGACCCCGTCTCTACAAAAAATATAAAAAATTAGCCGGGCGT
GGTGGCGCGCGCTGTAGTCCAGCTACTCGGAGGCTGAGGTGGGAGGATCGCTTGAGCCCAGGAGTTTCGAG
GCTGCAGTGAGCCATGATCGCGCCACTGCACTCCAGCCTGGGCGACAGAGCGAGACCCTGTCTCAAAAAA
>sf24 count=887 pvalue=7e-745 ( parent_pvalue=1e-5 ) parent=9 muts=
56:t/a Linup-refined
GGCCGGGCGCGGTGGCTCACGCCTGTAATCCAGCACTTTGGGAGGCCGAGGCGGGAGGATCGCTTGAGCCCA
GGAGTTGAGACCAGCCTGGGCAACATGGCGAAACCCCGTCTCTACAAAAAATACAAAAATTAGCCGGGCGT
GGTGGCGCGCGCTGTAGTCCAGCTACTCGGAGGCTGAGGTGGGAGGATCGCTTGAGCCCAGGAGTTTCGAG
GCTGCAGTGAGCCGTGATCGCGCCACTGCACTCCAGCCTGGGCGACAGAGCGAGACCCTGTCTCAAAAAA
>sf25 count=4205 pvalue=3e-191 ( parent_pvalue=5e-2242 ) parent=0 muts=
68:t/c Linup-refined
GGCCGGGCGCGGTGGCTCACGCCTGTAATCCAGCACTTTGGGAGGCCGAGGCGGGCGGATCACTTGAGGCCA
GGAGTTGAGACCAGCCTGGCCAACATGGCGAAACCCCGTCTCTACTAAAAAATACAAAAATTAGCCGGGCGTG
GTGGCGCGCGCTGTAATCCAGCTACTCGGAGGCTGAGGCAGGAGAATCGCTTGAACCCGGGAGGCGGAGG
TTGCAGTGAGCCGAGATCGCGCCACTGCACTCCAGCCTGGGCGACAGAGCGAGACTCTGTCTCAAAAAA
>sf26 count=7844 pvalue=9e-77 ( parent_pvalue=5e-2242 ) parent=0 muts=
161:a/g Linup-refined
GGCCGGGCGCGGTGGCTCACGCCTGTAATCCAGCACTTTGGGAGGCCGAGGCGGGCGGATCACCTGAGGTCA
GGAGTTGAGACCAGCCTGGCCAACATGGTGAAACCCCGTCTCTACTAAAAAATACAAAAATTAGCCGGGCGTG
GTGGCGCGCGCTGTAGTCCAGCTACTCGGAGGCTGAGGCAGGAGAATCGCTTGAACCCGGGAGGCGGAGG
TTGCAGTGAGCCGAGATCGCGCCACTGCACTCCAGCCTGGGCGACAGAGCGAGACTCCGTCTCAAAAAA
>AluSx1_sf27 count=5288 pvalue=4e-276 ( parent_pvalue=5e-2242 ) parent=0
muts= 151:c/g Linup-refined
GGCCGGGCGCGGTGGCTCACGCCTGTAATCCAGCACTTTGGGAGGCCGAGGCGGGCGGATCACCTGAGGTCA
GGAGTTGAGACCAGCCTGGCCAACATGGTGAAACCCCGTCTCTACTAAAAAATACAAAAATTAGCCGGGCGTG
GTGGCGGGCGCTGTAGTCCAGCTACTCGGAGGCTGAGGCAGGAGAATCGCTTGAACCCGGGAGGCGGAGG
TTGCAGTGAGCCGAGATCGCGCCACTGCACTCCAGCCTGGGCGACAGAGCGAGACTCCGTCTCAAAAAA
```

```

>sf28 count=805 pvalue=5e-38 ( parent_pvalue=5e-2242 ) parent=0 muts=
188:g/c Linup-refined
GGCCGGGCGCGGTGGCTCACGCCTGTAATCCCAGCACTTTGGGAGGCCGAGGCGGGCGGATCACTTGAGGTCA
GGAGTTCGAGACCAGCCTGGCCAACATGGCGAAACCCCGTCTCTACTAAAAATACAAAAATTAGCCGGGCGTG
GTGGCGCGCCTGTAATCCCAGCTACTCGGGAGGCTGAGGCACGAGAATCGCTTGAACCCGGGAGGCGGAGG
TTGCAGTGAGCCGAGATCGCGCCACTGCACTCCAGCCTGGGCGACAGAGCGAGACTCTGTCTCAAAAAA
>sf29 count=3417 pvalue=4e-128 ( parent_pvalue=9e-1230 ) parent=13 muts=
271:a/g Linup-refined
GGCCGGGCGCGGTGGCTCACGCCTGTAATCCCAGCACTTTGGGAGGCCGAGGCGGGCGGATCACCTGAGGTCA
GGAGTTCGAGACCAGCCTGGCCAACATGGTGAAACCCCGTCTCTACTAAAAATACAAAAATTAGCCGGGCGTG
GTGGCGCGCCTGTAATCCCAGCTACTCGGGAGGCTGAGGCAGGAGAATCGCTTGAACCCGGGAGGCGGAGG
TTGCAGTGAGCCGAGATCGCGCCATTGCACTCCAGCCTGGGCGACAAGAGCGAGACTCCGTCTCAAAAAA
>sf30 count=2081 pvalue=3e-16 ( parent_pvalue=5e-2242 ) parent=0 muts=
242:c/t Linup-refined
GGCCGGGCGCGGTGGCTCACGCCTGTAATCCCAGCACTTTGGGAGGCCGAGGCGGGCGGATCACCTGAGGTCA
GGAGTTCGAGACCAGCCTGGCCAACATGGTGAAACCCCGTCTCTACTAAAAATACAAAAATTAGCCGGGCGTG
GTGGCGCGCCTGTAATCCCAGCTACTCGGGAGGCTGAGGCAGGAGAATCGCTTGAACCCGGGAGGCGGAGG
TTGCAGTGAGCCGAGATCGCGCCATTGCACTCCAGCCTGGGCGACAGAGCGAGACTCCGTCTCAAAAAA
>sf32 count=2231 pvalue=1e-109 ( parent_pvalue=9e-1230 ) parent=13 muts=
242:t/c Linup-refined
GGCCGGGCGCGGTGGCTCACGCCTGTAATCCCAGCACTTTGGGAGGCCGAGGCGGGCGGATCACCTGAGGTCA
GGAGTTCGAGACCAGCCTGGCCAACATGGTGAAACCCCGTCTCTACTAAAAATACAAAAATTAGCCGGGCGTG
GTGGCGCGCCTGTAATCCCAGCTACTCGGGAGGCTGAGGCAGGAGAATCGCTTGAACCCGGGAGGCGGAGG
TTGCAGTGAGCCGAGATCGCGCCACTGCACTCCAGCCTGGGCAACAAGAGCGAAACTCCGTCTCAAAAAA
>sf33 count=2082 pvalue=2e-3050 ( parent_pvalue=9e-1230 ) parent=13 muts=
151:g/c Linup-refined
GGCCGGGCGCGGTGGCTCACGCCTGTAATCCCAGCACTTTGGGAGGCCGAGGCGGGCGGATCACCTGAGGTCA
GGAGTTCGAGACCAGCCTGGCCAACATGGTGAAACCCCGTCTCTACTAAAAATACAAAAATTAGCCGGGCGTG
GTGGCGCATGCCTGTAATCCCAGCTACTCGGGAGGCTGAGGCAGGAGAATCGCTTGAACCCGGGAGGCGGAGG
TTGCAGTGAGCCGAGATCGCGCCATTGCACTCCAGCCTGGGCAACAAGAGCGAAACTCCGTCTCAAAAAA
>sf34 count=60 pvalue=1e-4 ( parent_pvalue=6e-101 ) parent=18 muts=
186:t/c Linup-refined
GGCCGGGCGCGGTGGCTCACGCCTGTAATCCCAGCACTTTGGGAGGCCGAGGCGGGCGGATCACGAGGTCAGG
AGTTC AAGACCAGCCTGGCCAACATGGTGAAACCCCGTCTCTACTAAAAATACAAAAATTAGCTGGGCGTGGT
GGCNCGTGCCTGTAATCCCAGCTACTCGGGAGGCTGAGGCAGGAGAATTGCTTGAACCCGGGAGGCGGAGGTT
GCAGTGAGCCGAGATCGCGCCACTGCACTCCAGCCTGGGCTACAGAGCGAGACTCCATCTCAAAAAA
>sf35 count=5739 pvalue=9e-211 ( parent_pvalue=4e-6183 ) parent=3 muts=
71:a/g Linup-refined
GGCCGGGCGCGGTGGCTCACGCCTGTAATCCCAGCACTTTGGGAGGCCGAGGCGGGCGGATCACGAGGTCAGG
AGATCGAGACCATCCTGGCCAACATGGTGAAACCCCGTCTCTACTAAAAATACAAAAAATTAGCCGGGCGTGG
TGGCGCGCCTGTAGTCCCAGCTACTCGGGAGGCTGAGGCAGGAGAATCGCTTGAACCCGGGAGGCGGAGGT
TGCAGTGAGCCGAGATCGCGCCACTGCACTCCAGCCTGGGCGACAGAGCGAGACTCCGTCTCAAAAAA
>sf36 count=169 pvalue=5e-25 ( parent_pvalue=6e-4269 ) parent=1 muts=
88:t/a Linup-refined
GGCCGGGCGCGGTGGCTCAAGCCTGTAATCCCAGCACTTTGGGAGGCCGAGGCGGGTGGATCACGAGGTCAAG
AGATCGAGACCATCCAGGTCAACATGGTGAAACCCCGTCTCTACTAAAAATACAAAAAATTAGCTGGGCATGG
TGGCGCGTGCCTGTAATCCCAGCTACTCGGGAGGCTGAGGCAGGAGAATTGCCTGAACCCAGGAGGCGGAGGT
TGCGGTGAGCCGAGATCGCGCCATTGCACTCCAGCCTGGGTAACAAGAGCGAAACTCCGTCTCAAAAAA
>sf37 count=1176 pvalue=5e-1595 ( parent_pvalue=6e-4269 ) parent=1 muts=
72:g/c Linup-refined
GGCCGGGCGCGGTGGCTCAAGCCTGTAATCCCAGCACTTTGGGAGGCCGAGGCGGGTGGATCACGAGGTCAAC
AGATCGAGACCATCCTGGTCAACATGGTGAAACCCCGTCTCTACTAAAAATACAAAAAATTAGCTGGGCATGG
TGGCGCGTGCCTGTAATCCCAGCTACTCAGGAGGCTGAGGCAGGAGAATTGCCTGAACCCAGGAGGCGGAGGT
TGCGGTGAGCCGAGATCGCGCCATTGCACTCCAGCCTGGGTAACAAGAGCGAAACTCCGTCTCAAAAAA

```

```
>sf38 count=468 pvalue=4e-198 ( parent_pvalue=6e-4269 ) parent=1 muts=
97:t/a Linup-refined
GGCCGGGCGCGGTGGCTCANGCCTGTAATCCCAGCACTTTGGGAGGCCGAGGCGGGTGGATCACGAGGTCAAG
AGATCGAGACCATCCTGGTCAACAAGGTGAAACCCCGTCTCTACTAAAAATACAAAAAATTAGCTGGGCATGG
TGGCGCGTGCCTGTAATCCCAGCTACTCGGGAGGCTGAGGCAGGAGAATTGCCTGAACCCAGGAGGCGGAGGT
TGCGGTGAGCCGAGATCGCGCCATTGCACTCCAGCCTGGGTAACAAGAGCGAAACTCCGTCTCAAAAAA
>sf39 count=224 pvalue=7e-63 ( parent_pvalue=3e-1473 ) parent=10 muts=
198:t/c Linup-refined
AGCCGGGCGCGGTGGCTCACGCCTATAATCCCAGCACTTTGGGAGGCCGAGGCGGGTGGATCACGAGGTCAAG
AGATCGAGACCATCCTGGTCAACAAGGTGAAACCCCGTCTCTACTAAAAATACAAAAAATTAGCTGGGCATGGT
GGCGCGCGCCTGTAGTCCCAGCTACTCGGGAGGCTGAGGCAGGAGAATTGCCTGAACCCAGGAGGCGGAGGTT
GCGGTGAGCCGAGATCGCGCCATTGCACTCCAGCCTGGGTAACAACAGCGAAACTCCGTCTCAAAAAA
>sf40 count=326 pvalue=3e-396 ( parent_pvalue=6e-158 ) parent=6 muts=
282:a/t Linup-refined
GGCCGGGCGCGGTGGCTCACGCCTGTAATCCCAGCACTTTGGGAGGCCGAGGCGGGAGGATCGCTTGAGGCCA
GGAGTTCGAGACCAGCCTGGGCAACATAGCGAGACCCCGTCTCTACAAAAAATATAAAAAAATTAGCCGGGCGT
GGTGGCGCGCGCCTGTAGTCCCAGCTACTCGGGAGGCTGAGGCGGGAGGATCGCTTGAGCCCAGGAGTTCGAG
GCTGCAGTGAGCTATGATCGCGCCACTGCACTCCAGCCTGGGCGACAGAGCGAGACCCTGTCTCTAAAAA
>sf41 count=344 pvalue=2e-248 ( parent_pvalue=6e-158 ) parent=2 muts=
124:a/t Linup-refined
GGCCGGGCGCGGTGGCTCACGCCTGTAATCCCAGCACTTTGGGAGGCCGAGGCGGGAGGATCGCTTGAGCCCA
GGAGTTCGAGACCAGCCTGGGCAACATAGCGAGACCCCGTCTCTACAAAAAATTTAAAAAATTAGCCGGGCGT
GGTGGCGCGCGCCTGTAGTCCCAGCTACTCGGGAGGCTGAGGTGGGAGGATCGCTTGAGCCCGGGAGGTTCGAG
GCTGCAGTGAGCTGTGATCGCGCCACTGCACTCCAGCCTGGGCGACAGAGCGAGACCCTGTCTCTAAAAA
>sf42 count=378 pvalue=1e-229 ( parent_pvalue=6e-4269 ) parent=1 muts=
74:g/t Linup-refined
GGCCGGGCGCGGTGGCTCAAGCCTGTAATCCCAGCACTTTGGGAGGCCGAGGCGGGTGGATCACGAGGTCAAG
ATATCGAGACCATCCTGGTCAACATGGTGAACCCCGTCTCTACTAAAAATACAAAAAATTAGCTGGGCATGG
TGGCGCGTGCCTGTAATCCCAGCTACTCAGGAGGCTGAGGCAGGAGAATTGCCTGAACCCAGGAGGCGGAGGT
TGCGGTGAGCCGAGATCGCGCCATTGCACTCCAGCCTGGGTAACAAGAGCGAAACTCCGTCTCAAAAAA
>sf43 count=41 pvalue=4e-229 ( parent_pvalue=1e-119 ) parent=5 muts=
261:a/g Linup-refined
GGCCGGGCGCGGTGGCTCAAGCCTGTAATCCCAGCACTTTGGGAGGCCGAGGCGGGTGGATCACGAGGTCAAC
AGATCGAGACCATCCTGGTCAACATGGTGAACCCCGTCTCTACTAAATTACAAAAAATTAGCTGGGCACGG
TGGTGCGTGCCTGTAATCCCAGCTGCTCGGGAGGCTGAGGCAGGAGAATTGCCTGAACCCAGGAGGCGGAGAT
TGCGGTGAGCCGAGATCGCGCCATTGCACTCCAGCCTGGGTAGCAAGAGCGAAACTCCGTCTCAAAAAA
>sf44 count=204 pvalue=2e-127 ( parent_pvalue=6e-4269 ) parent=1 muts=
0:g/c Linup-refined
CGCCGGGCGCGGTGGCTCACGCCTGTAATCCCAGCACTTTGGGAGGCCGAGGCGGGTGGATCACGAGGTCAAG
AGATCGAGACCATCCTGGTCAACATGGTGAACCCCGTCTCTACTAAAAATACAAAAAATTAGCTGGGCATGG
TGGCGCGTGCCTGTAATCCCAGCTACTCAGGAGGCTGAGGCAGGAGAATTGCCTGAACCCAGGAGGCGGAGGT
TGCGGTGAGCCGAGATCGCGCCATTGCACTCCAGCCTGGGTAACAAGAGCGAAACTCCGTCTCAAAAAA
>sf45 count=357 pvalue=3e-119 ( parent_pvalue=6e-158 ) parent=2 muts=
160:a/g Linup-refined
GGCCGGGCGCGGTGGCTCACGCCTGTAATCCCAGCACTTTGGGAGGCCGAGGCGGGAGGATCGCTTGAGCCCA
GGAGTTCGAGACCAGCCTGGGCAACATAGCGAGACCCCGTCTCTACAAAAAATATAAAAAAATTAGCCGGGCGT
GGTGGCGCGCGCCTGTGGTCCCAGCTACTCGGGAGGCTGAGGCGGGAGGATCGCTTGAGCCCGGGAGGTTCGAG
GCTGCAGTGAGCTGTGATCGCGCCACTGCACTCCAGCCTGGGCGACAGAGCGAGACCCTGTCTCTAAAAA
>sf46 count=149 pvalue=3e-104 ( parent_pvalue=6e-4269 ) parent=1 muts=
266:a/c Linup-refined
GGCCGGGCGCGGTGGCTCAAGCCTGTAATCCCAGCACTTTGGGAGGCCGAGGCGGGTGGATCACGAGGTCAAG
AGATCGAGACCATCCTGGTCAACATGGTGAACCCCGTCTCTACTAAAAAATATAAAAAAATTAGCTGGGCA
TGGTGGCGCGTGCCTGTAATCCCAGCTACTCAGGAGGCTGAGGCAGGAGAATTGCCTGAACCCAGGAGGCGGA
GGTTGCGGTGAGCCGAGATCGCGCCATTGCACTCCAGCCTGGGTAACAAGCGCGAAACTCCGTCTCAAAAAA
```

```
>sf47 count=369 pvalue=5e-92 ( parent_pvalue=6e-4269 ) parent=1 muts=
265:g/a Linup-refined
GGCCGGGCGCGGTGGCTCANGCCTGTAATCCCAGCACTTTGGGAGGCCGAGGCGGGTGGATCACGAGGTCAAG
AGATCGAGACCATCCTGGTCAACATGGTGAAACCCCGTCTCTACTAAAAATACAAAAAATTAGCTGGGCATGG
TGGCGCGTGCCTGTAATCCCAGCTACTCAGGAGGCTGAGGCAGGAGAATTGCCTGAACCCAGGAGGCGGAGGT
TGCGGTGAGCCGAGATCGCGCCATTGCACTCCAGCCTGGGTAACAAAAGCGAAACTCCGTCTCAAAAAA
>sf48 count=63 pvalue=4e-80 ( parent_pvalue=2e-48 ) parent=8 muts=
244:g/t Linup-refined
GGCCGGGCGCGGTGGCTCACGCCTGTAATCCTAGCACTTTGGGAGGCCGAGGCGGGTGGATCACCTGAGGTCA
GGAGTTCGAGACCAGCCTGGCCAACATGGCGAAACCCCGTCTCTACTAAAAATACAAAAAATTAGCCGGGCGTG
GTGGCGGGCGCCTGTAATCCCAGCTACTCGGGAGGCTGAGGCAGGAGAATCGCTTGAACCCGGGGGGCGGAGG
TTGCAGTGAGCCGAGATCGCGCCACTTCACTCCAGCCTGGGCGAAAGAGCGAAACTCCGTCTCAAAAAA
>sf50 count=856 pvalue=4e-65 ( parent_pvalue=5e-2242 ) parent=0 muts=
188:g/t Linup-refined
GGCCGGGCGCGGTGGCTCACGCCTGTAATCCCAGCACTTTGGGAGGCCGAGGCGGGCGGATCACTTGAGGTCA
GGAGTTCGAGACCAGCCTGGCCAACATGGCGAAACCCCGTCTCTACTAAAAATACAAAAAATTAGCCGGGCGTG
GTGGCGCGCGCCTGTAATCCCAGCTACTCGGGAGGCTGAGGCATGAGAATCGCTTGAACCCGGGAGGCGGAGG
TTGCAGTGAGCCGAGATCGCGCCACTGCACTCCAGCCTGGGCGACAGAGCGAGACTCTGTCTCAAAAAA
>sf51 count=249 pvalue=2e-49 ( parent_pvalue=6e-4269 ) parent=1 muts=
95:c/a Linup-refined
GGCCGGGCGCGGTGGCTCAAGCCTGTAATCCCAGCACTTTGGGAGGCCGAGGCGGGTGGATCACGAGGTCAAG
AGATCGAGACCATCCTGGTCAAAATGGTGAAACCCCGTCTCTACTAAAGATACAAAAAATTAGCTGGGCATGG
TGGCGCGTGCCTGTAATCCCAGCTACTCGGGAGGCTGAGGCAGGAGAATTGCCTGAACCCAGGAGGCGGAGGT
TGCGGTGAGCCGAGATCGCGCCATTGCACTCCAGCCTGGGTAACAAGAGCGAAACTCCGTCTCAAAAAA
>sf52 count=133 pvalue=4e-50 ( parent_pvalue=6e-4269 ) parent=1 muts=
262:c/a Linup-refined
GGCCGGGCGCGGTGGCTCAAGCCTGTAATCCCAGCACTTTGGGAGGCCGAGGCGGGTGGATCACGAGGTCAAG
AGATCGAGACCATCCTGGTCAACATGGTGAAACCCCGTCTCTACTAAAAATACAAAAAATTAGCTGGGCATGG
TGGCGCGTGCCTGTAATCCCAGCTACTCAGGAGGCTGAGGCAGGAGAATTGCCTGAACCCAGGAGGCGGAGGT
TGCGGTGAGCCGAGATCGCGCCATTGCACTCCAGCCTGGGTAACAAAAGAGCGAAACTCCGTCTCAAAAAA
>sf53 count=139 pvalue=2e-44 ( parent_pvalue=6e-4269 ) parent=1 muts=
202:a/t Linup-refined
GGCCGGGCGCGGTGGCTCACGCCTGTAATCCCAGCACTTTGGGAGGCCGAGGCGGGTGGATCACGAGGTCAAG
AGATCGAGACCATCCTGGTCAACATGGTGAAACCCCGTCTCTACTAAAAATACAAAAAATTAGCTGGGCATGG
TGGCGCGTGCCTGTAATCCCAGCTACTCGGGAGGCTGAGGCAGGAGAATTGCCTGATCCCAGGAGGCGGAGGT
TGCGGTGAGCCGAGATCGCGCCATTGCACTCCAGCCTGGGTAACAAGAGCGAAACTCCGTCTCAAAAAA
>sf54 count=220 pvalue=1e-42 ( parent_pvalue=4e-6183 ) parent=3 muts=
258:g/c Linup-refined
GGCCGGGCGCGGTGGCTCACGCCTGTAATCCCAGCACTTTGGGAGGCCGAGGCGGGCGGATCACGAGGTCAAG
AGATCGAGACCATCCTGGCCAACATGGTGAAACCCCGTCTCTACTAAAAATACAAAAAATTAGCTGGGCGTGGT
GGCGCGCGCCTGTAGTCCCAGCTACTCGGGAGGCTGAGGCAGGAGAATCGCTTGAACCCGGGAGGCGGAGGTT
GCAGTGAGCCGAGATCGCGCCACTGCACTCCAGCCTGGCCGACAGAGCGAGACTCCGTCTCAAAAAA
>sf55 count=135 pvalue=1e-39 ( parent_pvalue=2e-300 ) parent=17 muts=
194:t/c Linup-refined
GGCCGGGCGCGGTGGCTCACGCCTGTAATCCCAGCACTTTGGGAGGCCGAGGCGGGTGGATCACGAGGTCAAG
AGTTCAGACAGCCTGGCCAAGATGGTGAAACCCCGTCTCTACTAAAAATACAAAAAATTAGCCGGGCGTGGT
GGCGGGCGCCTGTAATCCCAGCTACTCGGGAGGCTGAGGCAGAGAACTGCTTGAACCCGGGAGGCGGAGGTTG
CAGTGAGCCGAGATCGCGCCACTGCACTCCAGCCTGGGCGACAGAGCGAGACTCCGTCTCAAAAAA
>sf56 count=136 pvalue=1e-37 ( parent_pvalue=1e-5 ) parent=9 muts=
177:a/g Linup-refined
AGCCGGGCGCGGTGGCTCACGCCTGTAATCCCAGCACTTTGGGAGGCCGAGGCGGGCGGATCGCTTGAGCCCA
GGAGTTCGAGACCAGCCTGGGCAACATGGCGAAACCCCGTCTCTACAAAAATACAAAAAATTAGCCGGGCGTG
GTGGCGCGCGCCTGTAGTCCCAGCTACTTGGGGGGCTGAGGTGGGAGGATCGCTTGAGCCCGGAGGTGAGG
CTGCAGTGAGCCGTGATCGCGCCACTGCACTCCAGCCTGGGCGACAGAGCGAGACCCTGTCTCAAAAAA
```

```
>sf57 count=112 pvalue=9e-33 ( parent_pvalue=6e-158 ) parent=2 muts=
123:t/a Linup-refined
GGCCGGGCGCGGTGGCTCACGCCTGTAATCCCAGCACTTTGGGAGGCCGAGGCGGGAGGATCGCTTGAGCCCA
GGAGTTCGAGACCAGCCTGGGCAACATAGCGAGACCCCGTCTCTACAAAAAATATAGCCGGGCGTGG
TGGCGCGCGCCTGTAGTCCCAGCTACTCGGGAGGCTGAGGCGGGAGGATCGCTTGAGCCCGGGAGGTTCGAGGC
TGCAGTGAGCTGTGATCGCGCCACTGCACTCCAGCCTGGGCGACAGAGCGAGACCCTGTCTCAAAAAA
>sf58 count=93 pvalue=4e-30 ( parent_pvalue=6e-158 ) parent=2 muts=
62:a/t Linup-refined
GGCCGGGCGCGGTGGCTCACGCCTGTAATCCCAGCACTTTGGGAGGCCGAGGCGGGAGGATGCTCTTGAGCCC
AGGAGTTCGAGACCAGCCTGGGCAACATAGCGAGACCCCGTCTCTACAAAAATATAAAAAATTAGCCGGGCG
TGGTGGCGCGCCTGTAGTCCCAGCTACTCGGGAGGCTGAGGCGGGAGGATCGCTTGAGCCCGGGAGGTTCGA
GGCTGCAGTGAGCTGTGATCGCGCCACTGCACTCCAGCCTGGGCGACAGAGCGAGACCCTGTCTCAAAAAA
>sf59 count=577 pvalue=4e-30 ( parent_pvalue=5e-2242 ) parent=0 muts=
151:c/a Linup-refined
GGCCGGGCGCGGTGGCTCACGCCTGTAATCCCAGCACTTTGGGAGGCCGAGGCGGGCGGATCACCTGAGGTCA
GGAGTTCGAGACCAGCCTGGCCAACATGGTGAAACCCCGTCTCTACTAAAAATACAAAAATTAGCCGGGCGTG
GTGGCGAGCGCCTGTAATCCCAGCTACTCGGGAGGCTGAGGCAGGAGAATCGCTTGAACCCGGGAGGCGGAGG
TTGCAGTGAGCCGAGATCGCGCCACTGCACTCCAGCCTGGGCGACAGAGCGAGACTCCGTCTCAAAAAA
>sf60 count=103 pvalue=6e-30 ( parent_pvalue=6e-4269 ) parent=1 muts=
262:c/g Linup-refined
GGCCGGGCGCGGTGGCTCACGCCTGTAATCCCAGCACTTTGGGAGGCCGAGGCGGGTGGATCACGAGGTCAAG
AGATCGAGACCATCCTGGTCAACATGGTGAAACCCCGTCTCTACTAAAAATACAAAAATTAGCTGGGCATGG
TGGCGCGTGCCTGTAATCCCAGCTACTCGGGAGGCTGAGGCAGGAGAATTGCCTGAACCCAGGAGGCGGAGGT
TGCGGTGAGCCGAGATCGCGCCATTGCACTCCAGCCTGGGTAACAAGAGCGAAACTCCGTCTCAAAAAA
>sf61 count=64 pvalue=8e-30 ( parent_pvalue=3e-1473 ) parent=10 muts=
180:c/g Linup-refined
GGCCGGGCGCGGTGGCTCACGCCTATAATCCCAGCACTTTGGGAGGCCGAGGCGGGTGGATCACGAGGTCAAG
AGATCGAGACCATCCTGGTCAACGAGGTGAAACCCCGTCTCTACTAAAAATACAAAAATTAGCTGGGCATGGT
GGCGCGTGCTGTAATCCCAGCTACTCGGGAGGGTGAAGCAGGAGAATTGCCTGAACCCAGAAGGCGGAGGTT
GCGGTGAGCCGAGATCGTGCCATTGCACTCCAGTCTGGGTAACAACAGCGAAACTCCGTCTCAAAAAA
>sf62 count=149 pvalue=9e-28 ( parent_pvalue=6e-4269 ) parent=1 muts=
221:c/a Linup-refined
GGCCGGGCGCGGTGGCTCAAGCCTGTAATCCCAGCACTTTGGGAGGCCGAGGCGGGTGGATCACGAGGTCAAG
AGATCGAGACCATCCTGGTCAACATGGTGAAACCCCGTCTCTACTAAAAATACAAAAATTAGCTGGGCATGG
TGGCGCGTGCCTGTAATCCCAGCTACTCAGGAGGCTGAGGCAGGAGAATTGCCTGAACCCAGGAGGCGGAGGT
TGAGGTGAGCCGAGATCGCGCCATTGCACTCCAGCCTGGGTAACAAGAGCGAAACTCCGTCTCAAAAAA
>sf63 count=315 pvalue=8e-25 ( parent_pvalue=6e-4269 ) parent=1 muts=
278:t/c Linup-refined
GGCCGGGCGCGGTGGCTCANGCCTGTAATCCCAGCACTTTGGGAGGCCGAGGCGGGTGGATCACGAGGTCAAG
AGATCGAGACCATCCTGGTCAACATGGTGAAACCCCGTCTCTACTAAAAATACAAAAATTAGCTGGGCATGG
TGGCGCGTGCCTGTAATCCCAGCTACTCAGGAGGCTGAGGCAGGAGAATTGCCTGAACCCAGGAGGCGGAGGT
TGCGGTGAGCCGAGATCGCGCCATTGCACTCCAGCCTGGGTAACAAGAGCGAAACTCCGCCTCAAAAAA
>sf64 count=155 pvalue=8e-22 ( parent_pvalue=4e-6183 ) parent=3 muts=
195:t/a Linup-refined
GGCCGGGCGCGGTGGCTCACGCCTGTAATCCCAGCACTTTGGGAGGCCGAGGCGGGCGGATCACGAGGTCAAG
AGATCGAGACCATCCTGGCCAACATGGTGAAACCCCGTCTCTACTAAAAATACAAAAATTAGCCGGGCGTGGT
GGCGCGCGCCTGTAGTCCCAGCTACTCGGGAGGCTGAGGCAGGAGAATAGCTTGAACCCGGGAGGCGGAGGTT
GCAGTGAGCCGAGATCGCGCCACTGCACTCCAGCCTGGGCGACAGAGCGAGACTCCGTCTCAAAAAA
>sf65 count=89 pvalue=8e-21 ( parent_pvalue=6e-4269 ) parent=1 muts=
219:t/a Linup-refined
GGCCGGGCGCGGTGGCTCAAGCCTGTAATCCCAGCACTTTGGGAGGCCGAGGCGGGTGGATCACGAGGTCAAG
AGATCGAGACCATCCTGGTCAACATGGTGAAACCCCGTCTCTACTAAAAATACAAAAATTAGCTGGGCGTGG
TGGCGCGCGCCTGTAATCCCAGCTACTCGGGAGGCTGAGGCAGGAGAATTGCCTGAACCCAGGAGGCGGAGGT
AGCGGTGAGCCGAGATCGCGCCATTGCACTCCAGCCTGGGTAACGAGAGCGAAACTCCGTCTCAAAAAA
```

```
>sf66 count=103 pvalue=9e-21 ( parent_pvalue=6e-4269 ) parent=1 muts=
96:a/t Linup-refined
AGCCGGGCGCGGTGGCTCAAGCCTGTAATCCCAGCACTTTGGGAGGCCGAGGCGGGTGGATCACGAGGTCAAG
AGATCGAGACCATCCTGGTCAACTTGGTGAAACCCCGTCTCTACTAAAAATACAAAAAATTAGCTGGGCATGG
TGGCGCGTGCCTGTAATCCCAGCTACTCAGGAGGCTGAGGCAGGAGAATTGCCTGAACCCAGGAGGCGGAGGT
TGCGGTGAGCCGAGATCGCGCCATTGCACTCCAGCCTGGGTAACAAGAGCGAAACTCCGTCTCAAAAAA
>sf67 count=91 pvalue=3e-20 ( parent_pvalue=6e-158 ) parent=6 muts=
67:g/t Linup-refined
GGCCGGGCGCGGTGGCTCACGCCTGTAATCCCAGCACTTTGGGAGGCCGAGGCGGGAGGATCGCTTGAGTCCA
GGAGTTCGAGACCAGCCTGGGCAACATAGCGAGACCCCGTCTCTACAAAAAATATAAAAAATTAGCCGGGCGT
GGTGGCGCGTGCCTGTAGTCCCAGCTACTCGGGAGGCTGAGGCAGGAGATCGCTTGAGCCGAGGATTCGAG
GCTGCAGTGAGCTATGATCGCGCCACTGCACTCCAGCCTGGGCGACAGAGCGAGACCCTGTCTCAAAAAA
>sf68 count=252 pvalue=9e-20 ( parent_pvalue=6e-158 ) parent=2 muts=
107:c/t Linup-refined
GGCCGGGCGCGGTGGCTCACGCCTGTAATCCCAGCACTTTGGGAGGCCGAGGCGGGAGGATCGCTTGAGCCCA
GGAGTTCGAGACCAGCCTGGGCAACATAGCGAGACCTCGTCTCTACAAAAAATATAAAAAATTAGCCGGGCGT
GGTGGCGCGCGCTGTAGTCCCAGCTACTCGGGAGGCTGAGGTGGGAGGATCGCTTGAGCCCGGAGGTTCGAG
GCTGCAGTGAGCTGTGATCGCGCCACTGCACTCCAGCCTGGGCGACAGAGCGAGACCCTGTCTCAAAAAA
>sf69 count=92 pvalue=2e-18 ( parent_pvalue=3e-1473 ) parent=10 muts=
106:c/a Linup-refined
GGCCGGGCGCGGTGGCTCACGCCTATAATCCCAGCACTTTGGGAGGCCGAGGCGGGTGGATCACGAGGTCAAG
AGATCGAGACCATCCTGGTCAACAAGGTGAAACACCGTCTCTACTAAAAATACAAAAATTAGCTGGGCATGGT
GGCGCGCGCTGTAGTCCCAGCTACTCGGGAGGCTGAGGCAGGAGAATTGCTTGAACCCAGGAGGCGGAGGTT
GCGGTGAGCCGAGATCGCGCCATTGCACTCCAGCCTGGGTAACAAGAGCGAAACTCCGTCTCAAAAAA
>sf70 count=186 pvalue=1e-12 ( parent_pvalue=6e-158 ) parent=6 muts=
33:g/a Linup-refined
GGCCGGGCGCGGTGGCTCACGCCTGTAATCCCAACACTTTGGGAGGCCGAGGCGGGAGGATCGCTTGAGGCCA
GGAGTTCGAGACCAGCCTGGGCAACATAGCGAGACCCCGTCTCTACAAAAAATATAAAAAATTAGCCGGGCGT
GGTGGCGCGCGCTGTAGTCCCAGCTACTCGGGAGGCTGAGGCAGGAGATCGCTTGAGCCCAGGAGTTCGAG
GCTGCAGTGAGCTATGATCGCGCCACTGCACTCCAGCCTGGGCGACAGAGCGAGACCCTGTCTCAAAAAA
>sf71 count=66 pvalue=6e-12 ( parent_pvalue=6e-4269 ) parent=1 muts=
94:a/c Linup-refined
GGCCGGGCGCGGTGGCTCAAGCCTGTAATCCCAGCACTTTGGGAGGCCGAGGCGGGTGGATCACGAGGTCAAG
AGATCGAGACCATCCTGGTCAACATGGTGAAACCCCGTCTCTACTAAAAATACAAAAAATTAGCTGGGCATGG
TGGCGCGTGCCTGTAATCCCAGCTACTCAGGAGGCTGAGGCAGGAGAATTGCCTGAACCCAGGAGGCGGAGGT
TGCGGTGAGCCGAGATCGCGCCATTGCACTCCAGCCTGGGTAACAAGAGCGAAACTCCGTCTCAAAAAA
>sf72 count=78 pvalue=1e-11 ( parent_pvalue=6e-1473 ) parent=15 muts=
222:a/c Linup-refined
GGCCGGGCGCGGTGGCTCACGCCTGTAATCCCAGCACTTTGGGAGGCCGAGGCGGGCGGATCACCTGAGGTCCG
GGAGTTCGAGACCAGCCTGACCAACATGGAGAAACCCCGTCTCTACTAAAAATACAAAATTAGCCGGGCGTGG
TGGCGCATGCCTGTAATCCCAGCTACTCGGGAGGCTGAGGCAGGAGAATCGCTTGAACCCGGGAGGCGGAGGT
TGCCGTGAGCCGAGATCGCGCCATTGCACTCCAGCCTGGGCAACAAGAGCGAAACTCCGTCTCAAAAAA
>sf73 count=118 pvalue=1e-11 ( parent_pvalue=6e-4269 ) parent=1 muts=
132:t/a Linup-refined
GGCCGGGCGCGGTGGCTCACGCCTGTAATCCCAGCACTTTGGGAGGCCGAGGCGGGTGGATCACGAGGTCAAG
AGATCGAGACCATCCTGGTCAACATGGTGAAACCCCGTCTCTACTAAAAATACAAAAAATTAGCTGGGCATGG
TGGCGCGTGCCTGTAATCCCAGCTACTCAGGAGGCTGAGGCAGGAGAATTGCCTGAACCCAGGAGGCGGAGGT
TGCGGTGAGCCGAGATCGCGCCATTGCACTCCAGCCTGGGTAACAAGAGCGAAACTCCGTCTCAAAAAA
>sf74 count=316 pvalue=4e-11 ( parent_pvalue=4e-6183 ) parent=3 muts=
233:a/g Linup-refined
GGCCGGGCGCGGTGGCTCACGCCTGTAATCCCAGCACTTTGGGAGGCCGAGGCGGGCGGATCACGAGGTCAAG
AGATCGAGACCATCCTGGCCAACATGGTGAAACCCCGTCTCTACTAAAAATACAAAAAATTAGCTGGGCGTGG
TGGCGCGCGCTGTAGTCCCAGCTACTCGGGAGGCTGAGGCAGGAGAATCGCTTGAACCCGGGAGGCGGAGGT
```



TGCAGTGAGCCGAGGTCGCGCCACTGCACTCCAGCCTGGCGCCTGGTGACGGAGCGAGACTCTGTCTCAAAAAA  
A

>sf75 count=209 pvalue=7e-11 ( parent\_pvalue=5e-2242 ) parent=0 muts=  
161:a/t Linup-refined  
GGCCGGGCGCGGTGGCTCACGCCTGTAATCCCAGCACTTTGGGAGGCCGAGGCGGGCGGATCACCTGAGGTCA  
GGAGTTCGAGACCAGCCTGGCCAACATGGTGAAACCCCGTCTCTACTAAAAATACAAAAATTAGCCGGGCGTG  
GTGGCGCGCGCCTGTATTCCCAGCTACTCGGGAGGCTGAGGCAGGAGAATCGCTTGAACCCGGGAGGCGGAGG  
TTGCAGTGAGCCGAGATCGCGCCACTGCACTCCAGCCTGGGCGACAGAGCGAGACTCCGTCTCAAAAAA

>sf76 count=112 pvalue=9e-11 ( parent\_pvalue=6e-4269 ) parent=1 muts=  
186:c/g Linup-refined  
GGCCGGGCGCGGTGGCTCACGCCTGTAATCCCAGCACTTTGGGAGGCCGAGGCGGGTGGATCACGAGGTCAAG  
AGATCGAGACCATCCTGGTCAACATGGTGAAACCCCGTCTCTACTAAAAATACAAAAATTAGCTGGGCATGG  
TGGCGCGTGCCTGTAATCCCAGCTACTCAGGAGGCTGAGGGAGGAGAATTGCCTGAACCCAGGAGGCGGAGGT  
TGCGGTGAGCCGAGATCGCGCCATTGCACTCCAGCCTGGGTAACAAGAGCGAAACTCCGTCTCAAAAAA

>sf77 count=155 pvalue=1e-10 ( parent\_pvalue=5e-2242 ) parent=0 muts=  
161:a/c Linup-refined  
AGCCGGGCGCGGTGGCTCACGCCTGTAATCCCAGCACTTTGGGAGGCCGAGGCGGGCGGATCACTTGAGGTCA  
GGAGTTCGAGACCAGCCTGGCCAACATGGTGAAACCCCGTCTCTACTAAAAATACAAAAATTAGCCGGGCGTG  
GTGGCGCGCGCCTGTACTCCCAGCTACTCGGGAGGCTGAGGCAGGAGAATCGCTTGAACCCGGGAGGCGGAGG  
TTGCAGTGAGCCGAGATCGCGCCACTGCACTCCAGCCTGGGCGACAGAGCGAGACTCCGTCTCAAAAAA

>sf78 count=63 pvalue=3e-10 ( parent\_pvalue=1e-5 ) parent=9 muts= 197:c/a  
Linup-refined  
GGCCGGGCGCGGTGGCTCACGCCTGTAATCCCAGCACTTTGGGAGGCCGAGGCGGGCGGATCGCTTGAGCCCA  
GGAGTTCGAGACCAGCCTGGGCAACATGGCGAAACCCCGTCTCTACAAAAATACAAAAATTAGCCGGGCGTG  
GTGGCGCGCGCCTGTAGTCCCAGCTACTCGGGAGGCTGAGGTGGGAGGATCGATTGAGCCCGGAGGTTCGAGG  
CTGCAGTGAGCCGTGATCGCGCCACTGCACTCCAGCCTGGGCGACAGAGCGAGACCCTGTCTCAAAAAA

>sf79 count=68 pvalue=9e-9 ( parent\_pvalue=6e-158 ) parent=6 muts= 60:t/c  
Linup-refined  
GGCCGGGCGCGGTGGCTCACGCCTGTAATCCCAGCACTTTGGGAGGCCGAGGCGGGAGGACCGCTTGAGGCCA  
GGAGTTCGAGACCAGCCTGGGCAACATAGCGAGACCCCGTCTCTACAAAAATNTAAAAAATTAGCCGGGCGTG  
GGTGGCGCGCGCCTGTAGTCCCAGCTACTCGGGAGGCTGAGGCGGGAGGATCGCTTGAGCCCAGGAGTTTCGAG  
GCTGCAGTGAGCTATGATTGCGCCACTGCACTCCAGCCTGGGCGACAGAGCGAGACCCTGTCTCAAAAAA

>sf80 count=277 pvalue=2e-8 ( parent\_pvalue=9e-1230 ) parent=13 muts=  
234:t/c Linup-refined  
GGCCGGGCGCGGTGGCTCACGCCTGTAATCCCAGCACTTTGGGAGGCCGAGGCGGGCGGATCACCTGAGGTCA  
GGAGTTCGAGACCAGCCTGGCCAACATGGTGAAACCCCGTCTCTACTAAAAATACAAAAATTAGCCGGGCGTG  
GTGGCGGGCGCCTGTAATCCCAGCTACTCGGGAGGCTGAGGCAGGAGAATCGCTTGAACCCGGGAGGCGGAGG  
TTGCAGTGAGCCGAGACCGCGCCATTGCACTCCAGCCTGGGCGACAAGAGCGAAACTCCGTCTCAAAAAA

>sf81 count=157 pvalue=4e-8 ( parent\_pvalue=4e-6183 ) parent=3 muts=  
76:t/c Linup-refined  
GGCCGGGCGCGGTGGCTCACGCCTGTAATCCCAGCACTTTGGGAGGCCGAGGCGGGCGGATCACGAGGTCAAG  
AGACCGAGACCATCCTGGCCAACATGGTGAAACCCCGTCTCTACTAAAAATACAAAAATTAGCTGGGCGTGGT  
GGCGCGCGCCTGTAGTCCCAGCTACTCGGGAGGCTGAGGCAGGAGAATCGCTTGAACCCGGGAGGCGGAGGTT  
GCAGTGAGCCGAGATCGCGCCACTGCACTCCAGCCTGGGCGACAGAGCGAGACTCCGTCTCAAAAAA

>sf82 count=264 pvalue=8e-8 ( parent\_pvalue=6e-4269 ) parent=1 muts=  
281:c/a Linup-refined  
GGCCGGGCGCGGTGGCTCAAGCCTGTAATCCCAGCACTTTGGGAGGCCGAGGCGGGTGGATCACGAGGTCAAG  
AGATCGAGACCATCCTGGTCAACATGGTGAAACCCCGTCTCTACTAAAAATACAAAAATTAGCTGGGCATGG  
TGGCGCGTGCCTGTAATCCCAGCTACTCAGGAGGCTGAGGCAGGAGAATTGCCTGAACCCAGGAGGCGGAGGT  
TGCGGTGAGCCGAGATCGCGCCATTGCACTCCAGCCTGGGTAACAAGAGCGAAACTCCGTCTCAAAAAA

>sf83 count=56 pvalue=1e-7 ( parent\_pvalue=6e-158 ) parent=6 muts=  
196:g/c Linup-refined  
GGCTGGGCGCGGTGGCTCACGCCTGTAATCCCAGCACTTTGGGAGGCCGAGGCGGGAGGATCGCTTGAGGCCA  
GGAGTTCGAGACCAGCCTGGGCAACATAGCGAGACCCCGTCTCTACAAAAATATAAAAAATTAGCCGGGCGTG

GGTGGCGCGTGCCTGTAGTCCCAGCTACTCGGGAGGCTGAGGCGGGAGGATCCCTTGAGCCCAGGAGTTTCGAG  
GCTGCGAGTGAGCTATGATCGCGCCACTGCACTCCAGCCTGGGCGACAGAGCGAGACCCTGTCTCAAAAAA  
>sf84 count=118 pvalue=5e-7 ( parent\_pvalue=4e-6183 ) parent=3 muts=  
70:a/c Linup-refined  
GGCCGGGCGCGGTGGCTCACGCCTGTAATCCCAGCACTTTGGGAGGCCGAGGCGGGCGGATCACGAGGTCCAG  
AGATCGAGACCANCCTGGCCAACATGGCGAAACCCCGTCTCTACTAAAAATACAAAAATTAGCCGGGCGTGGT  
GGCGCGCGCCTGTAGTCCCAGCTACTCGGGAGGCTGAGGCGGGAGAATCGCTTGAACCCGGGAGGCGGAGGTT  
GCAGTGAGCCGAGATCGCGCCACTGCACTCCAGCCTGGGCGACAAGAGCGAGACTCTGTCTCAAAAAA  
>sf85 count=68 pvalue=1e-6 ( parent\_pvalue=6e-4269 ) parent=1 muts=  
74:g/c Linup-refined  
GGCCGGGCGCGGTGGCTCANGCCTGTAATCCCAGCACTTTGGGAGGCCGAGGCGGGTGGATCACGAGGTCAAG  
ACATCGAGACCATCCTGGTCAACATGGTGAAACCCCGTCTCTACTAAAAATACAAAAAATTAGCTGGGCATGG  
TGGCGCGTGCCTGTAATCCCAGCTACTCAGGAGGCTGAGGCAGGAGAATTGCCTGAACCCAGGAGGCGGAGGT  
TGCGGTGAGCCGAGATCGCGCCATTGCACTCCAGCCTGGGTAACAAGAGCGAAACTCCGTCTCAAAAAA  
>sf86 count=125 pvalue=3e-6 ( parent\_pvalue=6e-4269 ) parent=1 muts=  
229:c/g Linup-refined  
GGCCGGGCGCGGTGGCTCANGCCTGTAATCCCAGCACTTTGGGAGGCCGAGGCGGGTGGATCACGAGGTCAAG  
AGATCGAGACCATCCTGGTCAACATGGTGAAACCCCGTCTCTACTAAAAATACAAAAAATTAGCTGGGCATGG  
TGGCGCGTGCCTGTAATCCCAGCTACTCAGGAGGCTGAGGCAGGAGAATTGCCTGAACCCAGGAGGCGGAGGT  
TGCGGTGAGCGGAGATCGCGCCATTGCACTCCAGCCTGGGTAACAAGAGCGAAACTCCGTCTCAAAAAA  
>sf87 count=110 pvalue=4e-6 ( parent\_pvalue=1e-5 ) parent=9 muts= 195:c/g  
Linup-refined  
GGCCGGGCGCGGTGGCTCACGCCTGTAATCCCAGCACTTTGGGAGGCCGAGGCGGGCGGATCGCTTGAGCCCA  
GGAGTTCGAGACCAGCCTGGGCAACATGGCGAAACCCCGTCTCTACAAAAAATACAAAAATTAGCCGGGCGTG  
GTGGCGCGCGCCTGTAGTCCCAGCTACTCGGGAGGCTGAGGTGGGAGGATGGCTTGAGCCCGGGAGGTTCGAGG  
CTGCAGTGAGCCGTGATCGCGCCACTGCACTCCAGCCTGGGCGACAGAGCGAGACCCTGTCTCAAAAAA  
>sf88 count=90 pvalue=7e-7 ( parent\_pvalue=1e-5 ) parent=9 muts= 92:c/a  
Linup-refined  
GGCCGGGCGCGGTGGCTCACGCCTGTAATCCCAGCACTTTGGGAGGCCGAGGCGGGCGGATCGCTTGAGCCCA  
GGAGTTCGAGACCAGCCTGGGAAACATGGCGAAACCCCGTCTCTACAAAAAATACAAAAAATTAGCCGGGCGT  
GGTGGCGCGCGCCTGTAGTCCCAGCTACTCGGGAGGCTGAGGTGGGAGGATCGCTTGAGCCCGGGAGGTTCGAG  
GCTGCGAGTGAGCCGTGATCGCGCCACTGCACTCCAGCCTGGGCGACAGAGCGAGACCCTGTCTCAAAAAA  
>sf89 count=50 pvalue=1e-5 ( parent\_pvalue=6e-158 ) parent=2 muts=  
100:t/g Linup-refined  
GGCCGGGCGCGGTGGCTCACGCCTGTAATCCCAGCACTTTGGGAGGCCGAGGCGGGGAGGATCGCTTGAGCCCA  
GGAGTTCGAGACCAGCCTGGGCAACATAGGGAGACCCCGTCTCTACAAAAAATAAAAAAATTAGCCGGGCGTG  
GTGGCGCGCGCCTGTAGTCCCAGCTACTCGGGAGGCTGAGGTGGGAGGATCGCTTGAGCCCGGGAGGTTCGAGG  
CTGCAGTGAGCTGTGATCGCGCCACTGCACTCCAGCCTGGGCGACAGAGTGAGACCCTGTCTCAAAAAA  
>sf90 count=72 pvalue=8e-5 ( parent\_pvalue=4e-6183 ) parent=3 muts=  
71:a/c Linup-refined  
GGCCGGGCGCGGTGGCTCACGCCTGTAATCCCAGCACTTTGGGAGGCCGAGGCGGGCGGATCACGAGGTACAG  
AGATCGAGACCANCCTGGCCAACATGGTGAAACCCCGTCTCTACTAAAAATACAAAAAATTAGCCGGGCGTGGT  
GGCGCGCGCCTGTAGTCCCAGCTACTCGGGAGGCTGAGGCAGGAGAATCGCTTGAACCCGGGAGGCGGAGGTT  
GCAGTGAGCCGAGATCGCGCCACTGCACTCCAGCCTGGGCGACAGAGCGAGACTCCGTCTCAAAAAA  
>sf91 count=128 pvalue=1e-4 ( parent\_pvalue=8e-89 ) parent=16 muts=  
266:a/t Linup-refined  
GGCCGGGCGCGGTGGCTCACGCCTGTAATCCCAGCACTTTGGGAGGCCGAGGCGGGCGGATCACGAGGTACAGG  
AGTTCGAGACCAGCCTGGCCAACATGGTGAAACCCCGTCTCTACTAAAAATACAAAAAATTAGCCGGGCGTGG  
TGGCGGGCGCCTGTAATCCCAGCTACTCGGGAGGCTGAGGCAGGAGAATCGCTTGAACCCGGGAGGCGGAGGT  
TGCAGTGAGCCGAGATCGCGCCACTGCACTCCAGCCCGGGCGACAGTGCGGAGACTCCGTCTCAAAAAA  
>sf92 count=92 pvalue=3e-4 ( parent\_pvalue=1e-5 ) parent=9 muts= 172:t/c  
Linup-refined  
GGCCGGGCGCGGTGGCTCACGCCTGTAATCCCAGCACTTTGGGAGGCCGAGGCGGGCGGATCGCTTGAGCCCA  
GGAGTTCGAGACCAGCCTGGGCAACATGGCGAAACCCCGTCTCTACAAAAAATACAAAAAATTAGCCGGGCGT

```
GGTGGCGCGCGCCTGTAGTCCCAGCTACCCGGGAGGCTGAGGTGGGAGGATCGCCTGAGCCCGGGAGGTTCGAG
GCTGCAGTGAGCCGTGATCGCGCCACTGCACTCCAGCCTGGGCGACAGAGCGAGACCCTGTCTCAAAAAA
>sf93 count=268 pvalue=4e-4 ( parent_pvalue=5e-2242 ) parent=0 muts=
199:t/g Linup-refined
GGCCGGGCGCGGTGGCTCACGCCTGTAATCCCAGCACTTTGGGAGGCCGAGGCGGGCGGATCACCTGAGGTCA
GGAGTTCGAGACCAGCCTGGCCAACATGGTGAAACCCCGTCTCTACTAAAAATACAAAAATTAGCCGGGCGTG
GTGGCGCGCCTGTAATCCCAGCTACTCGGGAGGCTGAGGCGAGGAGAATCGCTGGAACCCGGGAGGCGGAGG
TTGCAGTGAGCCGAGATCGCGCCACTGCACTCCAGCCTGGGCGACAGAGCGAGACTCCGTCTCAAAAAA
>AluJo #SINE/Alu @Primates [S:85] RepbaseID: ALU
ggccgggcgcggtggctcacgcctgtaatcccagcactttgggaggccgaggcgggaggatcgcttgagccca
ggagttcgagaccagcctgggcaacatagcgagaccccgctctctacaaaaaatataaaaaattagccgggctg
gtggcgcgcgctgtagtcccagctactcgggaggctgaggcaggaggatcgcttgagcccaggagttcgagg
ctgcagtgagctatgatcgcgccactgcactccagcctgggcgacagagcgagaccctgtctcaaaaaa
>AluJr4 #SINE/Alu @Primates [S:85]
ggccgggcgcggtggctcacgcctgtaatcccagcactttgggaggccgaggcgggaggatcgcttgaggcca
ggagttcgagaccagcctgggcaacatagcgagaccccgctctctacaaaaaatntaaaaattagccgggctg
gtggcgcgcgctgtagtcctagctactcgggaggctgaggcaggaggatcgcttgagcccaggagttcgagg
ttacagtgagctatgatcgcgccactgcactccagcctgggcgacagagcgagaccctgtctcaaaaaa
>AluSc #SINE/Alu @Primates [S:85]
ggccgggcgcggtggctcacgcctgtaatcccagcactttgggaggccgaggcgggaggatcacgaggtcaag
agatcgagaccatcctggccaacatggtgaaaccccgctctctactaaaaatacaaaaaattagccgggctggt
ggcgcgcgctgtagtcccagctactcgggaggctgaggcaggagaatcgcttgaacccgggaggcggaggtt
gcagtgagccgagatcgcgccactgcactccagcctggcgacagagcgagactccgtctcaaaaaa
>AluSc5 #SINE/Alu @Primates [S:85]
ggccgggcgcggtggctcacgcctgtaatcccagcactttgggaggccgaggcgggaggatcacgaggtcagg
agatcgagaccatcctggccaacatggtgaaaccccgctctctactaaaaatacaaaaaattagctgggctggt
ggcgcgctgtagtcccagctactcgggaggctgaggcaggagaatcgcttgaaccaggaggagtcggaggtt
gcagtgagccgagatcgcgccactgcactccagcctggcgacagagcgagactccgtctcaaaaaa
>AluSc8 #SINE/Alu @Primates [S:85]
ggccgggcgcggtggctcacgcctgtaatcccagcactttgggaggccgaggcgggaggatcacgaggtcagg
agatcgagaccatcctggctaacacggtgaaaccccgctctctactaaaaatacaaaaaattagccgggctgg
tggcacgcgcctgtagtcccagctactcgggaggctgaggcaggagaatcgcttgaacccgggaggcggaggtt
tgcagtgagccgagatcgcgccactgcactccagcctgggcgacagagcgagactccgtctcaaaaaa
>AluSg #SINE/Alu @Primates [S:85]
ggccgggcgcggtggctcacgcctgtaatcccagcactttgggaggccgaggcgggaggatcacgaggtcagg
agttcgagaccagcctggccaacatggtgaaaccccgctctctactaaaaatacaaaaaattagccgggctggt
ggcgcgcgctgtaatcccagctactcgggaggctgaggcaggagaatcgcttgaacccgggaggcggaggtt
gcagtgagccgagatcgcgccactgcactccagcctgggcgacagagcgagactccgtctcaaaaaa
>AluSg4 #SINE/Alu @Primates [S:85]
ggccgggcgcggtggctcacgcctgtaatcccagcactttgggaggccgaggcgggtggatcacgaggtcagg
agttcgagaccagcctggccaagatggtgaaaccccgctctctactaaaaatacaaaaaattagccgggctggt
ggcgggcgctgtaatcccagctactcgggaggctgaggcaggagaatcgcttgaacccgggaggcggaggtt
gcagtgagccgagatcgcgccactgcactccagcctgggcgacagagcgagactccgtctcaaaaaa
>AluSg7 #SINE/Alu @Primates [S:85]
ggccgggcgcggtggctcacgcctgtaatcccagcactttgggaggccgaggcgggtggatcacgaggtcagg
agttcaagaccagcctggccaagatggtgaaaccccgctctctactaaaaatacaaaaaattagccgggctggt
ggcgggcgctgtaatcccagctactcgggaggctgaggcagagaattgcttgaacccgggaggcggaggtt
cagtgagccgagatcgcgccactgcactccagcctgggcgacagagcgagactccgtctcaaaaaa
>AluSp #SINE/Alu @Primates [S:85]
ggccgggcgcggtggctcacgcctgtaatcccagcactttgggaggccgaggcgggaggatcacctgaggtcg
ggagttcgagaccagcctgaccaacatggagaaaccccgctctctactaaaaatacaaaaaattagccgggctg
gtggcgcgcgctgtaatcccagctactcgggaggctgaggcaggagaatcgcttgaacccgggaggcggaggtt
ttgcggtgagccgagatcgcgccattgcactccagcctgggcaacaagagcgaaactccgtctcaaaaaa
>AluSq #SINE/Alu @Primates [S:85]
```

ggccgggcgcggtggctcacgcctgtaatcccagcactttgggaggccgaggcgggcggtacactgaggtcag  
ggagttcgagaccagcctggccaacatggtgaaaccccgctcttactaaaaatacaaaaattagccgggcggtg  
gtggcgggcgctgtaatcccagctactcgggaggctgaggcaggagaatcgcttgaacccgggaggcggagg  
ttgcagtgagccgagatcgcgccactgcactccagcctgggcaacaagagcgaaactccgtctcaaaaaa  
>AluSq4 #SINE/Alu @Primates [S:85]  
ggccgggcgcggtggctcacgcctgtaatcccagcactttgggaggccgaggcgggcggtacactgaggtcag  
gagttcgagaccagcctggccaacatggtgaaaccccgctcttactaaaaatacaaaaattagccgggcggtg  
tggcgggcgctgtaatcccagctactcgggaggctgaggcaggagaatcgcttgaacccggaaggcggagg  
tgcagtgagccgagatcgcgccactgcactccagcctgggcaacaagagcgaaactccgtctcaaaaaa  
>AluSq10 #SINE/Alu @Primates [S:85]  
ggccgggcgcggtggctcacgcctgtaatcccagcactttgggaggccgaggcgggtggatcacctgaggtcag  
ggagttctagaccagcctggccaacatggtgaaaccccgctcttactaaaaatacaaaaattagccgggcggtg  
gtggcaggcgctgtaatcccagctactcggggggcgaggcaggagaatcgcttgaacccgggaggcggagg  
ttgcagtgagccgagatcgcgccactgcactccagcctgggggacaagagcgagacttcgtctcaaaaaa  
>AluSx3 #SINE/Alu @Primates [S:85]  
ggccgggcgcggtggctcacgcctgtaatcccagcactttgggaggccgaggcgggcggtacacgaggtcagg  
agttcgagaccagcctggccaacatggtgaaaccccgctcttactaaaaatacaaaaattagccgggcggtg  
tggcgcgcgctgtagtcccagctactcgggaggctgaggcaggagaatcgcttgaacccgggaggcggagg  
tgcagtgagccgagatcgcgccactgcactccagcctgggcgacagagcgagactccgtctcaaaaaa  
>AluSx4 #SINE/Alu @Primates [S:85]  
ggccgggcgcggtggctcacgcctgtaatcccagcactttgggaggccgaggcgggcggtacactgaggtcag  
gagttcgagaccagcctggccaatggtgaaaccccgctcttactaaaaatacaaaaattagccgggcggtg  
tggcgcgcgctgtagtcccagctactcgggaggctgaggcagaagaatcgcttgaacccgggaggcggagg  
tgcagtgagccgagatcgcgccactgcactccagcctgggcgacagagcgagactccgtctcaaaaaa  
>AluSz #SINE/Alu @Primates [S:85]  
ggccgggcgcggtggctcacgcctgtaatcccagcactttgggaggccgaggcgggcggtacactttaggtcag  
ggagttcgagaccagcctggccaacatggtgaaaccccgctcttactaaaaatacaaaaattagccgggcggtg  
gtggcgcgcgctgtaatcccagctactcgggaggctgaggcaggagaatcgcttgaacccgggaggcggagg  
ttgcagtgagccgagatcgcgccactgcactccagcctgggcgacagagcgagactccgtctcaaaaaa  
>AluSz6 #SINE/Alu @Primates [S:85]  
ggccgggcgcggtggctcacgcctgtaatcccagcactttgggaggccgaggcgggcggtacactttagggcca  
ggagttcgagaccagcctggccaacatggcaaaccccgctcttactaaaaatacaaaaattagccgggcggtg  
gtggcgcgcgctgtaatcccagctactcgggaggctgaggcaggagaatcgcttgaacccgggaggcggagg  
ttgcagtgagccgagatcgcgccactgcactccagcctgggcgacagagcgagactctgtctcaaaaaa  
>AluTa7 #SINE/Alu @Platyrrhini [S:40,50]  
ggccgggcgcggtggctcacgcctgtaatcccagcactttgggaggccgaggcgggcggtacacgaggtcaag  
agatcgagaccatcctggccaacatggtgaaaccccgctcttactaaaaatacaaaaaattagctgggcggtg  
gtggcgcgcgctgtagtcccagctactcgggaggctgaggcaggagaattgcttgaacccgggaggcggagg  
ttgcagtgagccgaggtcgcgccactgcactccagcctggcgcgctggtgacggagtgaactctgtctcaaaa  
aa  
>AluTa10 #SINE/Alu @Platyrrhini [S:40,50]  
ggccgggcgcggtggctcacgcctrtaatcccagcactttgggaggccgaggcgggtggatcacgaggtcaag  
agatcgagaccatcctggtcaacatggtgaaaccccgctcttactaaaaatacaaaaattagctgggcatggt  
ggcgcgcgctgtagtcccagctactcgggaggctgaggcaggagaattgcttgaacccaggaggcggagg  
gagggtgagccgagatcgcgccattgcactccagcctgggtaacaagagcgaaactccgtctcaaaaaa  
>AluY #SINE/Alu @Primates [S:35,85]  
ggccgggcgcggtggctcacgcctgtaatcccagcactttgggaggccgaggcgggcggtacacgaggtcagg  
agatcgagaccatcctggctaacacggtgaaaccccgctcttactaaaaatacaaaaaattagccgggcggtg  
tggcgggcgctgtagtcccagctactcgggaggctgaggcaggagaatggcgtgaacccgggaggcggagg  
tgcagtgagccgagatcgcgccactgcactccagcctgggcgacagagcgagactccgtctcaaaaaa  
>AluYa5 #SINE/Alu @Primates [S:85]  
ggccgggcgcggtggctcacgcctgtaatcccagcactttgggaggccgaggcgggcggtacacgaggtcagg  
agatcgagaccatcccggctaaaacggtgaaaccccgctcttactaaaaatacaaaaaattagccgggcgtag

```
tggcgggcgctgtagtcccagctacttgggaggctgaggcaggagaatggcgtgaacccgggaggcggagct
tgcagtgagccgagatcccgccactgcactccagcctgggcgacagagcgagactccgtctcaaaaaa
>AluYa8 #SINE/Alu @Primates [S:85]
ggccgggcgcggtggctcacgcctgtaatcccagcactttgggaggccgaggcgggaggatcacgaggtcagg
agatcgagaccatcccggctaaaacggtgaaaccccgctctctactaaaactacaaaaaatagccgggcgtagt
ggcgggcgctgtagtcctagctacttgggaggctgaggcaggagaatggcgtgaacccgggaggcggagctt
gcagtgagccgagatcccgccactgcactccagcctgggcgacagagcgagactccgtctcaaaaaa
>AluYb8 #SINE/Alu @Primates [S:85]
ggccgggcgcggtggctcacgcctgtaatcccagcactttgggaggccgaggcgggtggatcatgaggtcagg
agatcgagaccatcctggctaacaagggtgaaaccccgctctctactaaaaatacaaaaaattagccgggcgag
tggcgggcgctgtagtcccagctactcgggaggctgaggcaggagaatggcgtgaacccgggaagcggagct
tgcagtgagccgagattgcgccactgcagtcgcagtcgggcctgggcgacagagcgagactccgtctcaaaa
aa
```
