# Supplementary material for: Framework of the Alu Subfamily Evolution in the Platyrrhine Three-Family Clade of Cebidae, Callithrichidae, and Aotidae
Source: MDPI journal article supplement (doi:10.3390/genes14020249), 2023-01-18
Supplement: s1 [file s1]

```

>subfamily0 count=28821 pvalue=5e-388 ( parent_pvalue=5e-388 )
ggccgggcgcggtggctcaagcctgtaatcccagcactttgggaggccgaggcgggtggatcacgaggtcaagagat
cgagaccatcctgggtcaacatggtgaaaccccgctcttactaaaaatacaaaaaAttagctgggcatggtggcgcggt
gctgtaatcccagctactcaggaggtgaggcaggagaattgcctgaaccaggaggcgaggttgcggtgagccg
agatcgcgccattgcactccagcctgggtaacAagagcgaaactccgtctc
>subfamily1 count=580 pvalue=8e-118 ( parent_pvalue=5e-388 ) parent=0 muts=
199:c/t 162:a/g 19:a/c
ggccgggcgcggtggctcacgcctgtaatcccagcactttgggaggccgaggcgggtggatcacgaggtcaagagat
cgagaccatcctgggtcaacatggtgaaaccccgctcttactaaaaatacaaaaaattagctgggcatggtggcgcggtg
cctgtagtcccagctactcgggaggtgaggcaggagaattgcttgaaccaggaggcgaggttgcggtgagccga
gatcgcgccattgcactccagcctgggtaacAagagcgaaactccgtctc
>subfamily2 count=396 pvalue=7e-139 ( parent_pvalue=5e-388 ) parent=0 muts=
186:g/a 99:t/a 66:g/a
ggccgggcgcggtggctcaagcctgtaatcccagcactttgggaggccgaggcgggtggatcacaaggtcaagagat
cgagaccatcctgggtcaacaaggtgaaaccccgctcttactaaaaatacaaaaaAttagctgggcatggtgggtgcgt
gctgtaatcccagctactcaggaggtgagacaggagaattgcctgaaccaggaggcgaggttgcggtgagccg
agatcgcgccattgcactccagcctgggtaacAagagcgaaactccgtctc
>subfamily3 count=56 pvalue=4e-102 ( parent_pvalue=5e-388 ) parent=0 muts=
87:t/g 77:a/t 65:-/t
ggccgggcgcggtggctcacgcctgtaatcccagcactttgggaggccgaggcgggtggatcacaaggtcaggaggt
cgagaccagcctggccaaaatgttgaaaccccgctcttactaaaaatacaaaaaattagctgggcgcggtggcacgcg
cctgtaatcccagctactcaggaggtgaggcaggagaatcgcttgaacctgggaggcgaggttgacgtgagccga
gatcggtgccattgcactccagcctgggtgacagagtgcactctgtctc
>subfamily4 count=1544 pvalue=1e-641 ( parent_pvalue=5e-388 ) parent=0 muts=
203:a/g 174:c/t
ggccgggcgcggtggctcaagcctgtaatcccagcactttgggaggccgaggcgggtggatcacgaggtcgagagat
cgagaccatcctgggtcaacatggtgaaaccccgctcttactaaaaatacaaaaaActagctgggcatggtggcgcggt
gctgtaatcccagctacttaggaggtgaggcaggagaattgcctgagccaggaggcgaggttgcggtgagccg
agatcgcgccattgcactccagcctgggtaacAagagcgaaactccgtctc
>subfamily5 count=1171 pvalue=1e-451 ( parent_pvalue=5e-388 ) parent=0 muts=
159:g/a 87:t/a
ggccgggcgcggtggctcaagcctgtaatcccagcactttgggaggccgaggcgggtggatcacaaggtcgagagat
cgagaccaacctgggtcaacatggtgaaaccccgctcttactaaaaatacaaaaaAttagctgggcatggtggcgcggt
gcctataatcccagctactcaggaggtgaggcaggagaattgcctgaaccaggaggcgaggttgcggtgagccg
agatcgcgccattgcactccagcctgggtaacAagagcgaaactccgtctc
>subfamily6 count=233 pvalue=3e-62 ( parent_pvalue=8e-118 ) parent=1 muts=
212:g/a 51:g/a
ggccgggcgcggtggctcacgcctataatcccagcactttgggaggccgagacgggtggatcacgaggtcaagagat
cgagaccatcctgggtcaacatggtgaaaccccgctcttactaaaaatacaaaaaattagctgggcatggtggcgcacg
cctgtagtcccagctactcgggaggtgaggcaggagaattgcttgaaccaggagacggaggttgcggtgagccga
gatcgcgccattgcactccagcctgggtaacAagagcgaaactccgtctc
>subfamily7 count=79 pvalue=1e-51 ( parent_pvalue=8e-118 ) parent=1 muts=
265:g/c 89:c/t
ggccgggcgcggtggctcacgcctataatcccagcactttgggaggccgaggcgggtggatcacgaggtcaagagat
cgagaccatcctgggtcaacaaggtgaaaccccgctcttactaaaaatacaaaaaattagccgggcatggtgggtgcacg
cctgtagtcccagctactcgggaggtgaggcaggagaattgcttgaaccaggaggcgaggttgcggtgagccga
gatcggtgccattgcactccagcctgggtaacAacagcgaaactccgtctc
>subfamily8 count=48 pvalue=8e-118 ( parent_pvalue=8e-118 ) parent=1 muts=
259:g/- 190:g/a
ggccgggcgcggtggctcacgcctgtaatcccagcactttgggaggccgaggcgggtggatcacgaggtcaagagat
cgagaccatcctggccaacatggtgaaaccccgctcttactaaaaatacaaaaaattagctgggcatggtggcgcggtg
cctgtagtcccagctactcgggaggtgaggcaggagaattgcttgaaccaggaggcgaggttgacgtgagccga
gattgtgacctgcactccagcctggcgacagagcaagactctgtctc
>subfamily9 count=71 pvalue=4e-48 ( parent_pvalue=8e-118 ) parent=1 muts=
274:t/c 174:c/a
ggccgggcgcggtggctcaagcctgtaatcccagcactttgggaggccgaggcgggtggatcacgaggtcaagagat
cgagaccatcctgggtcaacatggtgaaaccccgctcttactaaaaatacaaaaaattagctgggcatggtggcgcacg

```

```

cctgtagtcccagctactagggaggctgaggcaggagaattgcttgaacccaggaggcgagggttgcggtgagccga
gatcgcgccattgcactccagcctgggtaacAagagcgaaaccccgctctc
>subfamily10 count=58 pvalue=1e-26 ( parent_pvalue=5e-388 ) parent=0 muts=
92:g/a 74:g/a
ggccgggcgcggtggctcaagcctgtaatcccagcactttgggaggccgaggcggtggatcacgaggtcaaaagat
cgagaccatcctgatcaacatggtgaaaccccgctctactaaaaatacaaaaaAttagctgggcatggtggcgcggt
gcctgtaatcccagctactcaggaggctgaggcaggagaattgcctgaacccaggaggcgagggttgcggtgagccg
agatcgcgccattgcactccagcctgggtaacAagagcgaaactccgtctc
>subfamily11 count=63 pvalue=6e-61 ( parent_pvalue=5e-388 ) parent=0 muts=
171:a/- 153:g/c
ggccgggcgcggtggctcaagcctgtaatcccagcactttgggaggccgaggcggtggatcacgaggtcaagagat
cgagaccatcctggtcaacatggtgaaaccccgctctactaaaaatacaaaaaattagctggcggtggtggcgcggt
cctgtaatcccagctcgggaggctgaggcaggagaattgcttgaacccaggaggcgagggttgcggtgagccgagat
cgcgccattgcactccagcctgggtaacAagagcgaaactccgtctc
>subfamily12 count=55 pvalue=2e-17 ( parent_pvalue=5e-388 ) parent=0 muts=
277:g/c 119:t/c
ggccgggcgcggtggctcaagcctgtaatcccagcactttgggaggccgaggcggtggatcacgaggtcaagagat
cgagaccatcctggtcaacatggtgaaaccccgctctactaaaaatacaaaaaAttagctgggcatggtggcgcggt
gcctgtaatcccagctactcaggaggctgaggcaggagaattgcctgaacccaggaggcgagggttgcggtgagccg
agatcgcgccattgcactccagcctgggtaacAagagcgaaactccctctc
>subfamily13 count=48 pvalue=3e-48 ( parent_pvalue=8e-118 ) parent=1 muts=
52:c/a 6:g/a
ggccggacgcggtggctcacgcctgtaatcccagcactttgggaggccgaggagggtggatcacgaggtcaagagat
cgagaccatcctggccaacatggtgaaaccccgctctactaaaaatgcaaaaaAttagccggacgtggtggcacat
gcctgtaatcccagctacttgggaggctgagacaggagaattgcttgaacccaggaggcgagggttgcggtgagccg
agaatgcgcccattgcactccagcctgggcaacaAgagcgaaactccgtctc
>subfamily14 count=40 pvalue=5e-15 ( parent_pvalue=5e-388 ) parent=0 muts=
80:g/t 22:c/t
ggccgggcgcggtggctcaagcctgtaatcccagcactttgggaggccgaggcggtggatcacgaggtcgagagat
ctagaccatcctggtcaacatggtgaaaccccgctctactaaaaatacaaaaaAttagctgggcatggtggcgcggt
gcctgtaatcccagctactcaggaggctgaggcaggagaattgcctgaacccaggaggcgagggttgcggtgagccg
agatcgcgccattgcactccagcctgggtaacAagagcgaaactccgtctc
>subfamily15 count=42 pvalue=1e-17 ( parent_pvalue=1e-641 ) parent=4 muts=
100:g/a 19:a/-
ggccgggcgcggtggctcagcctgtaatcccagcactttgggaggccgaggcggtggatcacgaggtcgagagatc
gagaccatcctggtcaacatagtgaaaccccgctctactaaaaatacaaaaaActagctggcggtggtggcgcggtg
cctgtaatcccagctacttaggaggctgaggcaggagaattgcctgagcccaggaggcgagggttgcggtgagccga
gatcgcgccattgcactccagcctgggtaacGagagcgaaactccgtctc
>subfamily16 count=94 pvalue=1e-6 ( parent_pvalue=5e-388 ) parent=0 muts=
146:g/a 98:a/t
ggccgggcgcggtggctcaagcctgtaatcccagcactttgggaggccgaggcggtggatcacaggtcaagagat
cgagaccatcctggtcaacatggtgaaaccccgctctattaaaaatacaaaaaAttagctgggcatggtggggcggt
gcctgtaatcccagctactcaggaggctgaggcaggagaattgcctgaacccaggaggcgagggttgcggtgagccg
agatcgcgccattgcactccagcctgggtaacAagagcgaaactccgtctc
>subfamily17 count=49 pvalue=3e-26 ( parent_pvalue=8e-118 ) parent=1 muts=
187:c/t 166:c/t
ggccgggcgcggtggctcacgcctataatcccagcactttgggaggccgaggcggtggatcacgaggtcaagagat
cgagaccatcctggtcaacaaggtgaaaccccgctctactaaaaatacaaaaaattagctgggcatggtggcgcgcg
cctgtagtccatgctactcgggaggctgaggtaggagaattgcttgaactcaggaggcgagggttgcggtgagccga
gatcgcgccattgcactccagcctgggtaacAagagcgaaactccatctc
>subfamily18 count=57 pvalue=9e-26 ( parent_pvalue=7e-139 ) parent=2 muts=
109:c/t 96:a/g
ggccgggcgcggtggctcaagcctgtaatcccagcactttgggaggccgaggcggtggatcacgaggtcaagagat
cgagaccatcctggtcaacatggtgaaaccccgctctactaaaaatacaaaaaattagctgggcatggtggcgcggt
tcccagctactcaggaggctgaggcaggagaattgcctgaacccaggaggcgagggttgcggtgagccgagatcgcg
ccattgcactccagcctgggtaacaAgagcgaaactccgtctc

```

```

>subfamily19 count=81 pvalue=2e-17 ( parent_pvalue=7e-139 ) parent=2 muts=
109:c/t 96:a/g
ggccgggcgcggtggctcaagcctgtaatcccagcactttgggaggccgaggcggggggatcacgagggaagagat
cgagaccatcctgggtcaacatgggtgaaaccccgctcttactaaaaatacaaaaattagctgggcatgggtggcgctg
cctgtaatcccagctactcaggaggctgaggcaggagaattgcctgaaccaggaggcggaggttgcggtgagccga
gatcgcgccattgcactccagcctgggtaacAagagcgaaactccgtctc
>subfamily20 count=16 pvalue=5e-9 ( parent_pvalue=4e-102 ) parent=3 muts=
243:t/c
ggccgggcgcggtggctcacgcctgtaatcccagcactttgggaggccgaggcggggcggtcaccaagggtcaggagtt
cgagaccagcctggccaacatgggtgaaaccccgctcttactaaaaatacaaaaattagctgggcatggtggcgacga
cctgtaatcccagctactcaggaggctgaggcaggagaatcgcttgaacctgggaggcggaggttgcagtgagccga
gatcatgccactgcactccagcctgggtgacagagtgcactccgtctc
>subfamily21 count=141 pvalue=4e-174 ( parent_pvalue=8e-118 ) parent=1 muts=
174:c/a
ggccgggcgcggtggctcacgcctgtaatcccagcactttgggaggccgaggcgggtggatcacgagggtcaagagat
cgagaccatcctgggtcaacatgggtgaaaccccgctcttactaaaaatacaaaaattagctgggcatgggtggcgacg
cctgtagtcccagctactaggaggctgaggcaggagaattgcttgaaccaggaggcggaggttgcggtgagccga
gatcgcgccattgcactccagcctgggtaacAagagcgaaactccgtctc
>subfamily22 count=172 pvalue=8e-49 ( parent_pvalue=8e-118 ) parent=1 muts=
99:t/a
ggccgggcgcggtggctcacgcctgtaatcccagcactttgggaggccgaggcgggtggatcacgagggtcaagagat
cgagaccatcctgggtcaacaagggtgaaaccccgctcttactaaaaatacaaaaattagctgggcatgggtggcgctg
cctgtagtcccagctactcgggaggctgaggcaggagaattgcttgaaccaggaggcggaggttgcggtgagccga
gatcgcgccattgcactccagcctgggtaacAagagcgaaactccgtctc
>subfamily23 count=75 pvalue=2e-4 ( parent_pvalue=8e-118 ) parent=1 muts=
243:t/c
ggccgggcgcggtggctcacgcctgtaatcccagcactttgggaggccgaggcgggtggatcacgagggtcaagagat
cgagaccatcctgggtcaacatgggtgaaaccccgctcttactaaaaatacaaaaattagctgggcatgggtggcgctg
cctgtagtcccagctactcgggaggctgaggcaggagaattgcttgaaccaggaggcggaggttgcggtgagccga
gatcgcgccattgcactccagcctgggtaacAagagcgaaactccgtctc
>subfamily24 count=363 pvalue=1e-9 ( parent_pvalue=8e-118 ) parent=1 muts=
199:t/c
ggccgggcgcggtggctcacgcctgtaatcccagcactttgggaggccgaggcgggtggatcacgagggtcaagagat
cgagaccatcctgggtcaacatgggtgaaaccccgctcttactaaaaatacaaaaattagctgggcatgggtggcgctg
cctgtagtcccagctactcaggaggctgaggcaggagaattgcctgaaccaggaggcggaggttgcggtgagccga
gatcgcgccattgcactccagcctgggtaacAagagcgaaactccgtctc
>subfamily25 count=49 pvalue=1e-5 ( parent_pvalue=8e-118 ) parent=1 muts=
212:g/a
ggccgggcgcggtggctcaagcctgtaatcccagcactttgggaggccgaggcgggtggatcacgagggtcaagagat
cgagaccatcctgggtcaacatgggtgaaaccccgctcttactaaaaatacaaaaattagctgggcatgggtggcgacg
cctgtagtcccagctactcgggaggctgaggcaggagaattgcttgaaccaggagacggaggttgcggtgagccga
gatcgcgccattgcactccagcctgggtaacAagagcgaaactccgtctc
>subfamily26 count=29 pvalue=5e-230 ( parent_pvalue=4e-48 ) parent=9 muts=
210:a/g
ggccgggcgcggtggctcaagcctgtaatcccagcactttgggaggccgaggcgggtggatcacgagggtcaagagat
cgagaccatcctgggtcaacatgggtgaaaccccgctcttactaaaaatacaaaaattagctgggcatgggtggcgacg
cctgtagtcccagctactcgggaggctgaggcaggagaattgcttgaaccaggagacggaggttgcggtgagccga
gatcggtgccattgcactccagcctgggtaacAagagcgaaaccccgctctc
>subfamily27 count=33 pvalue=2e-146 ( parent_pvalue=1e-51 ) parent=7 muts=
96:a/g
ggccgggcgcggtggctcacgcctataatcccagcactttgggaggccgaggcgggtggatcacgagggtcaagagat
cgagaccatcctgggtcagcaagggtgaaaccccgctcttactaaaaatacaaaaattagccgggcatgggtggcgacg
cctgtagtcccagctactcgggaggctgaggcaggagaattgcttgaaccaggaggcggaggttgcggtgagccga
gattgtgccattgcactccagcctgggtaacAacagcgaaactccgtctc
>subfamily28 count=48 pvalue=3e-124 ( parent_pvalue=8e-118 ) parent=8 muts=
161:a/g

```

```
ggccgggcgcggtggctcacgcctgtaatcccagcactttgggaggccgaggcggtggatcacgaggtcaagagat
cgagaccatcctggccaacatggtgaaaccccgctctctactaaaaatacaaaaaattagccgggcatggtggcgagctg
cctgtggtcccagctactcgggaggtgagggcggaagaatcgcttgaacccaggaggcggttgcagtgcgagccga
gattgcgccactgcactccagcctggtgacagagcaagactccgtctc
>subfamily29 count=11 pvalue=2e-110 ( parent_pvalue=1e-26 ) parent=10 muts=
254:c/a
ggccgggcgcggtggctcaagcctgtaatcccagcactttgggaggccgaggcggtggatcacgaggtcaaaagat
cgagaccatcctgatcaacatggtgaaaccccgctctctactaaaaatacaaaaaAtttagctgggcatggtggcgagct
gcctgtaatcccagctactcaggaggtgagggcaggagaattgcctgaacccaggaggcggttgcggtgagccg
agatcgcgccattgcactccagactgggtaacAagagcgaaactccgtctc
>subfamily30 count=37 pvalue=2e-100 ( parent_pvalue=7e-139 ) parent=2 muts=
148:g/t
ggccgggcgcggtggctcaagcctgtaatcccagcactttgggaggccgaggcggtggatcacaaaggtcaagagatc
gagaccatcctggtcaacaaggtgaaaccccgctctctactaaaaatacaaaaaAtttagctgggcatggttgtgcgctg
cctgtaatcccagctactcaggaggtgagacaggagaattgcctgaacccaggaggcggttgcggtgagccga
gatcgcgccattgcactccagcctgggtaacAagagcgaaactccgtctc
>subfamily31 count=20 pvalue=1e-56 ( parent_pvalue=1e-51 ) parent=7 muts=
254:c/t
ggccgggcgcggtggctcacgcctataatcccagcactttgggaggccgaggcggtggatcacgaggtcaagagat
cgagaccatcctggtcaacaaggtgaaaccccgctctctactaaaaatacaaaaaattagctgggcatggtggtgcag
cctgtagtcccagctactcgggaggtgagggcaggagaattgcttgaacccaggaggcggttgcggtgagccga
gatcggtgccattgcactccagctcgggtaacAacagcgaaactccgtctc
>subfamily32 count=20 pvalue=3e-51 ( parent_pvalue=7e-139 ) parent=2 muts=
254:c/g
ggccgggcgcggtggctcaagcctgtaatcccagcactttgggaggccgaggcggtggatcacaaaggtcaagagat
cgagaccaacctTggtcaacaaggtgaaaccccgctctctactaaaaatacaaaaaAtttagctgggcatggtggtgca
tgctgtaatcccagctactcaggaggtgagacaggagaattgcctgaacccaggaggcggttgcggtgagcc
gagatcggtgccattgcactccagcctgggtaacAagagcgaaactccgtctc
>subfamily33 count=91 pvalue=3e-48 ( parent_pvalue=8e-118 ) parent=1 muts=
88:c/t
ggccgggcgcggtggctcacgcctgtaatcccagcactttgggaggccgaggcggtggatcacgaggtcaagagat
cgagaccattctggtcaacatggtgaaaccccgctctctactaaaaatacaaaaaattagctgggcatggtggcgagc
cctgtagtcccagctactcgggaggtgagggcaggagaattgcttgaacccaggaggcggttgcggtgagccga
gatcgcgccattgcactccagcctgggtaacAagagcgaaactccgtctc
>subfamily34 count=24 pvalue=4e-46 ( parent_pvalue=3e-62 ) parent=6 muts=
171:a/t
ggccgggcgcggtggctcacgcctataatcccagcactttgggaggccgagacgggtggatcacgaggtcaagagat
cgagaccatcctggtcaacatggtgaaaccccgctctctactaaaaatacaaaaaattagctgggcatggtggcgagc
cctgtagtcccagcttctcgggaggtgagggcaggagaattgcttgaacccaggaggcggttgcggtgagccga
gatcgcgccattgcactccagcctgggtaacAagagcgaaactccgtctc
>subfamily35 count=28 pvalue=2e-42 ( parent_pvalue=8e-118 ) parent=8 muts=
101:g/a
ggccgggcgcggtggctcacgcctgtaatcccagcactttgggaggccgaggcggtggatcacgaggtcaagagat
cgagaccatcctggccatgatgaaaccccgctctctactaaaaatacaaaaaattagccgggtgtggtggcgagcgcct
gtagtcccagctactcgggaggtgagggcggaagaatcgcttgaacccaggaggcggttgcagtgcgagccgagat
tgcgccactgcactccagcctggcgacagagcaagactccgtctc
>subfamily36 count=34 pvalue=3e-35 ( parent_pvalue=1e-641 ) parent=4 muts=
204:c/a
ggccgggcgcggtggctcaagcctgtaatcccagcactttgggaggccgaggcggtggatcacgaggtcgaaagat
cgagaccatcctggtcaacatggtgaaaccccgctctctactaaaaatacaaaTaaaactagctgggcatggtggcgag
tgctgtaatcccagctacttaggaggtgagggcaggagaattgcctgagaccaggaggcggttgcggtgagcc
gagatcggtgccattgcactccagcctgggtaacAagagcgaaactccgtctc
>subfamily37 count=25 pvalue=9e-32 ( parent_pvalue=1e-451 ) parent=5 muts=
233:g/t
ggccgggcgcggtggctcaagcctgtaatcccagcactttgggaggccgaggcggtggatcacaaaggtcgagagat
cgagaccaacctggtcaacatggtgaaaccccgctctctactaaaaatacaaaaaAtttagctgggcatggtggcgagct
```

```

gcctgtaatcccagctactcaggaggctgaggcaggagaattgcctgaacccaggaggcgagggttgcggtgagccg
atatcgcgccattgcactccagcctgggtaacAagagcgaaactccgtctc
>subfamily38 count=10 pvalue=4e-28 ( parent_pvalue=8e-118 ) parent=8 muts=
146:g/t
ggccgggcgcggtggctcacgcctgtaatcccagcactttgggaggccgaggcaggtggatcacgaggtcaagagat
cgagaccatcctggccaacatggtgaaaccccgctctactaaaaatacaaaaaattagccgggcttggcgacgcgc
ctgtagtcccagctactcgggaggctgaggcggaagaatcgcttgaacccaggaggcgagggttgcagtgagccgag
actgcgccactgcactccagcctggcaacagagcaagactccgtctc
>subfamily39 count=25 pvalue=4e-11 ( parent_pvalue=1e-451 ) parent=5 muts=
174:c/g
ggccgggcgcggtggctcaagcctgtaatcccagcactttgggaggccgagggtgggtggatcacaaggtcgagagat
cgagaccaacctggccaacatggtgaaaccccgctctactaaaaatacaaaaaattagctgggcatggtggcgcgct
gcctataatcccagctactgaggaggctgaggcaggagaattgcctgaacccaggaggcgagggttgcggtgagccg
agatcgcgccattgcactccagcctgggtaacAagagcgaaactccgtctc
>subfamily40 count=23 pvalue=9e-10 ( parent_pvalue=8e-118 ) parent=1 muts=
152:c/a
ggccgggcgcggtggctcacgcctataatcccagcactttgggaggccgaggcggggtggatcacgaggtcaagagat
cgagaccatcctggccaacatggtgaaaccccgctctactaaaaatacaaaaaattagctgggcatggtggcgagtg
cctgtagtcccagctactcgggaggctgaggcaggagaattgcttgaacccaggaggcgagggttgcggtgagccga
gatcgcgccattgcactccagcctgggtaacAagagcgaaactccgtctc
>subfamily41 count=10 pvalue=4e-7 ( parent_pvalue=3e-62 ) parent=6 muts=
88:c/a
ggccgggcgcggtggctcacgcctataatcccagcactttgggaggccgagacgggtggatcacgaggtcaagagat
cgagaccatactggccaacatggtgaaaccccgctctactaaaaatacaaaaaattagctgggcatggtggcgcacg
cctgtagtcccagctactcgggaggctgaggcaggagaattgcttgaacccaggagacggagggttgcggtgagccga
gatcgcgccattgcactccagcctgggtaacagagcgaaactccgtc
>subfamily42 count=10 pvalue=4e-7 ( parent_pvalue=3e-62 ) parent=6 muts=
108:c/g
ggccgggcgcggtggctcacgcctataatcccagcactttgggaggccgagacgggtggatcacgaggtcaagagat
cgagaccatcctggccaacatggtgaaaccccgctctactaaaaatacaaaaaattagctgggcatggtggcgcacg
cctgtagtcccagctactcgggaggctgaggcaggagaattgcttgaacccaggagacggagggttgcggtgagccga
gatcgcgccattgcactccagcctgggtaacAagagcgaaactctgtctc
>subfamily43 count=32 pvalue=9e-6 ( parent_pvalue=7e-139 ) parent=2 muts=
151:g/t
ggccgggcgcggtggctcaagcctgtaatcccagcactttgggaggccgaggcggggtggatcacaaggtcaagagat
cgagaccatcctggccaacatggtgaaaccccgctctactaaaaatacaaaaaattagctgggcatggtggctcgt
gcctgtaatcccagctactcaggaggctgagacaggagaattgcctgaacccaggaggcgagggttgcggtgagccg
agatcgtgccattgcactccagcctgggtaacAagagcgaaactccgtctc
>subfamily44 count=10 pvalue=3e-5 ( parent_pvalue=8e-118 ) parent=1 muts=
212:g/c
ggccgggcgcggtggctcacgcctgtaatcccagcactttgggaggccgaggcggggtggatcacgaggtcaagagat
cgagaccatcctggccaacatggtgaaaccccgctctactaaaaatacaaaaaattagccgggcatggtggcgcacgc
ctgtagtcccagctactcaggaggctgaggcaggagaattgcttgaacccgggagccggaagttgcagtgagcagag
atcgcgccattgcactccagcctgggtaacAagagcgaaactccgtctc
>subfamily45 count=10 pvalue=1e-4 ( parent_pvalue=3e-62 ) parent=6 muts=
173:t/c
ggccgggcgcggtggctcacgcctataatcccagcactttgggaggctgagacgggtggatcacgaggtcaagagat
cgagaccatcctggccaacatggtgaaaccccgctctactaaaaatacaaaaaattagctgggcatggtggcgcacgc
cctgtagtcccagctactcgggaggctgaggcaggagaattgcttgaacccaggagacggagggttgcggtgagccga
gatcgcgccattgcactccagcctgggtaacAagagcgaaactccgtctc

```
