# Supplementary material for: Framework of the Alu Subfamily Evolution in the Platyrrhine Three-Family Clade of Cebidae, Callithrichidae, and Aotidae
Source: MDPI journal article supplement (doi:10.3390/genes14020249), 2023-01-18
Supplement: s1 [file s1]

Alu consensus sequence for 8 Alu subfamilies lineage specific to Cebus monkey [Cebus\_imitator-1.0]

>subfamily1\_Ceb

-GCCGGGCGCGGTGGCTCACGCCTGTAATCCCAGCACTTTGGGAGGCCGAGGCGGGTGGAT-CAC--  
GAGGTCAAGAGATCGAGACCA-TCCTGGCCAACATGGTGAACCCCGTCTCTACTAAAA-ATACAAAAA---  
TTAGCTGGGCATGGTGGCACGCGCCTGTAGTCCCAGCTACTCGGGAGGCTGAGGCAGGAGAATTGCTTGAACCCA  
GGAGGCGGAGGTTGCAGTGAGCCGAGATCGCGCCACTGCACTCCAGCCTGG-----CGACA-  
GAGCGAGACTCCGTCTCA-----

>subfamily6\_Ceb

GGCCGGGCGCGGTGGCTCACGCCTGTAATCCCAGCACTTTGGGAGGCCGAGGCGGGCGGGAT-CAC--  
GAGGTCAAGAGATCGAGACCA-TTCTCGCC---ATGATGAAACCCCGTCTCTACTAAAA-ATACAAAAA---  
TTAGCCGGGTGTGGTGGCACGCGCCTGTAGTCCCAGCTACTCGGGAGGCTGAGGCGGAAGAATCGCTTGAACCC  
AGGAGGCGGAGGTTGCAGTGAGCCGAGATTGCGCCACTGCACTCCAGCCTGG-----CGACA-  
GAGCAAGACTCCGTCTCA-----

>subfamily7\_Ceb

-GCCGGGCGCGGTGGCTCACGCCTGTAATCCCAGCACTTTGGGAGGCCGAGGCGGGCGGGAT-CAC--  
GAGGTCAAGAGATCGAGACCA-TCCTGGCCAACATGGTGAACCCCGTCTCTACTAAAA-ATACAAAAA---  
TTAGCCGGGCATGGTGGCACGCGCCTGTGGTCCCAGCTACTCGGGAGGCTGAGGCGGAAGAATCGCTTGAACCC  
AGGAGGCGGAGGTTGCAGTGAGCCGAGATTGCGCCACTGCACTCCAGCCTGG-----TGACA-  
GAGCAAGACTCCGTCTCA-----

>subfamily3\_Ceb

-GCCGGGCGCGGTGGCTCACGCCTATAATCCCAGCACTTTGGGAGGCCGAGGCGGGTGGAT-CAC--  
GAGGTCAAGAGATCGAGACCA-TCCTGGTCAACAAGGTGAAACCTCGTCTCTACTAAAA-ATACAAAAA---  
TTAGCTGGGCATGATGGTGCCTGTAGTCCCAGCTACTCGGGAGGCTGAGGCAGGAGAATTGCTTGAACCCA  
GGAGGCGGAGGTTGCGGTGAGCCGAGATCGTGCCATTGCACTCCAGTCTGGG-----  
CAACAACAGCGAAACTCCGTCTCA-----

>subfamily5\_Ceb

-GCCGGGCGCGGTGGCTCAAGCCTGTAATCCCAGCACTTTGGGAGGCCGAGGCGGGTGGAT-CAC--  
GAGGTCAAGAGATCGAGACCA-TCCTGGTCAACAAGGTGAAACCTCGTCTCTACTAAAA-ATACAAAAA---  
TTAGCTGGGCATGATGGTGCATGCCTGTAGTCCCAGCTACTCGGGAGGCTGAGGCCGAGAGAATTGCTTGAACCCA  
GGAGGCGGAGGTTGCGGTGAGCCGAGATCGTGCCATTGCACTCCAGCCTGGG-----  
CAACAACAGCAAAACTCCGTCTCA-----

>subfamily4\_Ceb

-GCCGGGCGCGGTGGCTCACGCCTGTAATCCCAGCACTTTGGGAGGCCGAGGCGGGTGGAT-CAC--  
GAGGTCAAGAGATCGAGACCA-TCCTGGTCAAAATGGTGAACCCCGTCTCTACTAAAA-ATACA-A-  
AAATTAGCTGGGCATGGTGGCGCGTGCCTGTAATCCCAGCTACTCAGGAGGCTGAGGCAGGAGAATTGCCTGA

ACCCAGGAGGCGGAGGTTGCGGTGAGCCGAGATCGCGCCATTGCACTCCAGCCTGGG-----  
TAACAAGAGCGAAACTCCGACTCA-----

>subfamily2\_Ceb

-GCCGGGCGCGGTGGCTCAAGCCTGTAATCCCAGCACTGTGGGAGGCCGAGGCGGGTGGAT-CAC--  
GAGGTCAAGAGATCGAGACCA-TCCTGGTCAACATGGTGAAACCCCGTCTCTACTAAAA-ATACA-AAAAA-  
TTAGCTGGGCATGGTGGCGCGTGCCTGTAATCCCAGCGACTCAGGAGGCTGGGGCAGGAGAATTGCCTGAACCC  
GGGAGGCGGAGGTTGCGGTGAGCCGAGATCGCGCCATTGCACTCCAGCCTGGG-----  
TAACAAGAGCGAAACTCCGTCTCA-----

>subfamily8\_Ceb

-GCCGGGCGCGGTGGCTCAAGCCTGTAATCCCAGCACTGTGGGAGGCCGAGGCGGGTGGAT-CAC--  
GAGGTCAAGAGATCGAGACCA-TCCTGGTCAACATGGTGAAACCCCGTCTCTACTAAAA-ATACA-AAAAA-  
TTAGCTGGGCATGGTGGCGCGTGCCTGTAATCCCAGCGACTCAGGAGGCTGGGGCAGGAGAATTGCCTGAACCC  
GGGAGGCGGAGGTTGCGGTGAGCCGAGATCGCGCCATTGCACTCCAGCCTGGG-----  
TAACAAGAGGGAAACTCCGTCTCA-----
