# Supplementary material for: Framework of the Alu Subfamily Evolution in the Platyrrhine Three-Family Clade of Cebidae, Callithrichidae, and Aotidae
Source: MDPI journal article supplement (doi:10.3390/genes14020249), 2023-01-18
Supplement: s1 [file s1]

Alu consensus sequences for 25 Alu subfamilies lineage specific to owl monkey; Anan\_2.0

>subfamily4\_Owl#SINE/Alu

-GCCGGGCGCGGTGGCTCACGCCTGTAATCCCAGCACTTTGGGAGGCCGAGGCGGGTGGAT-CAC--  
GAGGTCAGGAGTTCGAGACCA-GCCTGGCCAAGATGTTGAAACCCCGTCTCTACTAAAAA-TACAAAAA---  
TTAGCTGGGCGTGGTGGCACGCACCTGTAATCCCAGCTACTCAGGAGGCTGAGGCAGGAGAATCGCTTGAACCTG  
GGAGGCGGAGGTTGCAGTGAGCCGAGATCGCGCCATTGCACTCCAGCCTGGG-----TGACA-  
GAGTGAGACTCCGTCTCA-----

>subfamily22\_Owl#SINE/Alu

-GCCGGGCGCGGTGGCTCACGCCTGTAATCCCAGCACTTTGGGAGGCCGAGGCGGGTGGAT-CAC--  
GAGGTCAGGAGTTCGAGACCA-GCCTGACCAACATGGTGAAACCCCGTCTCTACTAAAAA-TACAAAAA---  
TTAGCTGGGCGTGGTGGCACACGCCTGTAATCCCAGCTACTCAGGAGGCTGAGGCAGGAGAATTGCCTGAACCTG  
GGAGGCAGAGGTTGCAGTGAGCCAAGATCGTGCCACTGCACTCCAGCCTGGG-----CGACA-  
GAGTGAGACTTCGTCTCA-----

>subfamily1\_Owl#SINE/Alu

-GCCGGGCGCGGTGGCTCACGCCTGTAATCCCAGCACTTTGGGAGGCCGAGGCGGGCGGAT-CAC--  
GAGGTCAAGAGATCGAGACCA-TCCTGGCCAACATGGTGAAACCCCGTCTCTACTAAAA-ATACAAAAA---  
TTAGCCGGGCGTGGTGGCACGCGCCTGTGGTCCCAGCTACTCGGGAGGCTGAGGCAGAAGAATCGCTTGAACCC  
AGGAGGCGGAGGTTGCAGTGAGCCGAGATTGCGCCACTGCACTCCAGCCTGG-----CGACA-  
GAGCAAGACTCCGTCTCA-----

>subfamily21\_Owl#SINE/Alu

-GCCGGGCGCGGTGGCTCACGCCTGTAATCCCAGCACTTTGGGAGGCCGAGGCGGGCGGAT-CAC--  
GAGGTCAAGAGATCGAGACCA-TCCTGGCC---ATGGTGAAACCCCGTCTCTACTAAAA-ATACAAAAA---  
TTAGCCGGGCGTGGTGGCACACGCCTGTGGTCCCAGCTACTCGGGAGGCTGAGGCAGAAGAATCGCTTGAACCC  
AGGAGGTGGAGGTTGCAGTGAGCCGAGACTGCGCCACTGCACTCCAGCCTGG-----CAACA-  
GAGCAAGACTCCGTCTCA-----

>subfamily7\_Owl#SINE/Alu

GGCCGGGCGCGGTGGCTCACGCCTGTAATCCCAGCACTTTGGGAGGCCGAGGCGGGCGGAT-CAC--  
GAGGTCAAGAGATCGAGACCA-TCCTCACC---ATGATGAAACCCCGTCTCTACTAAAA-  
ATACAAAAAAATTAGCCGGGTGTGGTGGCACGCGCCTGTAGTCCCAGCTACTCGGGAGGCTGAGGCGGAAGAA  
TCGCTTGAACCCAGGAGGCGGAGGTTGCAGTGAGCCGAGATTGCGCCACTGCACTCCAGCCTGG-----AGACA-  
GAGCAAGACTCCGTCTCA-----

>subfamily14\_Owl#SINE/Alu

---CGGGCGCGGTGGCTCACGCCTGTAATCCCAGCACTTTGGGAGGCCGAGGTGGGCGGAT-CAC--  
GAGGTCAAGAGATCGAGACCA-TCCTGGCC---ATGATGAAACCCCGTCTCTACTAAAA-ATACAAAAA---  
TTAGCCGGGTGTGGTGGCACGCGCCTGTAGTCCCAGCTACTCGGGAGGCTGAGGCGGAAGAATCGCTTGAACCC

AGGAGGCGGAGGTTGCAGTGAGCCGAGATTGCGCCACTGCACTCCAGCCTGG-----TGACA-  
GAGCAAGACTCCGTCTCA-----

>subfamily26\_Owl#SINE/Alu

GGCCGGGCGCGGTGGCTCACGCCTGTAATCCCAGCACTTTGGGAGGCCGAGGCGGGCGGAT-CAC--  
GAGGTCAAGAGATCGAGACCA-TCCTGGCCAACATGGTGAAACCCCGTCTCTACTAAAA-GTACAAAAA--  
TTAGCCGGGCGTGGTGGTGCCTGTAGTCCCAGCTACTCGGGAGGCTGAGGCAGGAGAATTGCTTGAAACC  
AGAAAACGGAAGTTGCAGTGAGCCGGGATCGCGCCACTGCACTCCAGCCTGG-----CGATA-  
GAGCAAGACTCTGTCTCA-----

>subfamily13\_Owl#SINE/Alu

-GCCGGGCGCGGTGGCTCACGCCTGTAATCCCAGCACTTTGGGAGGCCGAGGCGGGCGGAT-CAC--  
GAGGTCAAGAGATCGAGACCA-TCCTGGCCAACATGGTGAAACCCCGTCTCTACTAAAA-ATACAAAAA---  
ATAGCCGGGCATGGTGGCACGTGCCTGTGGTCCCAGCTACTCGGGAGGCTGAGGCGGAAGAATCGCTTGAACCC  
AGGAGGCGGAGGTTGCAGTGAGCCGAGATTGCGCCACTGCACTCCAGCCTGG-----CGATA-  
GAGCAAGACTCCGTCTCA-----

>subfamily5\_Owl#SINE/Alu

-GCCGGGCGCGGTGGCTCACGCCTGTAATCCCAGCACTTTGGGAGGCCGAGGCGGGCGGAT-CAC--  
GAGGTCAAGAGATCGAGACCA-TCCTGGCCAACATGGTGAAACCCCGTCTCTACTAAAA-ATACAAAAA---  
ATAGCCGGGCATGGTGGCACGTGCCTGTGGTCCCAGCTACTCGGGAGGCTGAGGCGGAAGAATCGCTTGAATCC  
AGGAGGCGGAGGTTGCAGTGAGCCGAGATTGCGCCATTGCACTCCAGCCTGG-----CGATA-  
GAGCAAGACTCCGTCTCA-----

>subfamily12\_Owl#SINE/Alu

-GCCGGGCGCGGTGGCTCACGCCTGTAATCCCAGCACTTTGGGAGGCCGAGGCGGGCGGAT-CAC--  
GAGGTCAAGAGATCGAGACCA-TACTGGCCAACATGGTGAAACCCCGTCTCTACTAAAA-ATACAAAAA---  
ATAGCCGGGCATGGTGGCACGTGCCTGTGGTCCCAGCTACTCGGGAGGCTGAGGTGGAAGAATCGCTTGAATCC  
AGGAGGCGGAGGTTGCAGTGAGCCGAGATTGCGCCACTGCACTCCAGCCTGG-----CGATA-  
GAGCAAGACTCCGTCTCA-----

>subfamily29\_Owl#SINE/Alu

-GCCGGGCGCGGTGGCTCACGCCTATAATCCCAGCACTTTGGGAGGCCGAGGCGGGTGGAT-CAC--  
GAGGTCAAGAGATCGAGACCA-TCCTGGTCAACATGGTGAAACCCCGTCTCTACTAAAA-  
ATACAAAAAAATTAGCTGGGCATGGTGGCGTGCCTGTAGTCCCAGCTACTCGGGAGGCTGAGGCAGGAGAA  
TTGCTTGAACCCAGGAGGCGGAGGTTGCGGTGAGCCGAGATCGCGCCATTGCACTCCAGCCTGGG-----  
TAACAAGAGCGAAACTCCGACTCA-----

>subfamily11\_Owl#SINE/Alu

GGCCGGGCGCGGTGGCTCACGCCTATAATCCCAGCACTTTGGGAGGCCGAGGCGGGTGGAT-CAC--  
GAGGTCAAGAGATCGAGACCA-TCCTGGTCAACATGGTGAAACCCCGTCTCTACTAAAC-ATACAAAAA--  
TTAGCCGAGCATGGTGGTGCCTGTAGTCCCAGCTACTCGGGAGGCTGAGGCAGGAGAATTGCTTGAACCCA  
GGAGGCGGAGGTTGCGGTGAGCCGAGATCGCGCCATTGCACTCCAGCCTGGG-----  
TAACAAGAGCGAAACTCCGTCTCA-----

>subfamily3\_Owl#SINE/Alu

-GCCGGGCGCGGTGGCTCACGCCTATAATCCCAGCACTTTGGGAGGCCGAGGCGGGTGGAT-CAC--  
GAGGTCAAGAGATCGAGACCA-TCCTGGTCAACATGGTGAAACCCCGTCTCTACTAAAA-ATACAAAAA---  
TTAGCTGGGCATGGTGGCGCACGCCTGTAGTCCCAGCTACTCGGGAGGCTGAGGCAGGAGAATTGCTTGAACCCA  
GGAGGCGGAGGTTGCGGTGAGCCGAGATCGCGCCATTGCACTCCAGCCTGGG-----  
TAACAAGAGCGAAACTCCGTCTCA-----

>subfamily16\_Owl#SINE/Alu

-GCCGGGCGCGGTGGCTCACGCCTATAATCCCAGCACTTTGGGAGGCCGAGACGGGTGGAT-CAC--  
GAGGTCAAGAGATCGAGACCA-TCCTGGTCAACATGGTGAAACCCCGTCTCTACTAAAA-ATACAAAAA---  
TTAGCTGGGCATGGTGGCGCACGCCTGTAGTCCCAGCTACTCGGGAGGCTGAGGCAGGAGAATTGCTTGAACCCA  
GGAGGCGGAGGTTGCGGTGAGCCGAGATCGCGCCATTGCACTCCAGCCTGGG-----  
TAACAAGAGCGAAACTCCGTCTCA-----

>subfamily8\_Owl#SINE/Alu

-GCCGGGCGCGGTGGCTCACGCCTATAATCCCAGCACTTTGGGAGGCCGAGGCGGGTGGAT-CAC--  
GAGGTCAAGAGATCGAGACCA-TCCTGGTCAACAAGGTGAAACCCCGTCTCTACTAAAA-ATACAAAAA---  
TTAGCTGGGCATGGTGGTGGCGCCTGTAGTCCCAGCTACTCGGGAGGCTGAGGCAGGAGAATTGCTTGAACCCA  
GGAGGCGGAGGTTGCGGTGAGCCGAGATCGCGCCATTGCACTCCAGTCTGGG-----  
TAACAACAGCGAAACTCCGTCTCA-----

>subfamily15\_Owl#SINE/Alu

-GCCGGGCGCGGTGGCTCACGCCTATAATCCCAGCACTTTGGGAGGCCGAGGCGGGTGGAT-CAC--  
GAGGTCAAGAGATCGAGACCA-TCCTGGTCAACAAGGTGAAACCCCGTCTCTACTAAAA-ATACAAAAA---  
TTAGCTGGGCATGGTGGCGCACGCCTGTAGTCCCAGCTACTCGGGAGGCTGAGGCAGGAGAATTGCTTGAACCCA  
GGAGGCGGAGGTTGCGGTGAGCCGAGATCGCGCCATTGCACTCCAGCCTGGG-----  
TAACAAGAGCGAAACTCCGTCTCA-----

>subfamily20\_Owl#SINE/Alu

-GCCGGGCGCGGTGGCTCAAGCCTGTAATCCCAGCACTTTGGGAGGCCGAGGCGGGTGGAT-CAC--  
GAGGTCAAGAGATCGAGACCA-TCCTGGTCAACATGGTGAAACCCCGTCTCTACT---A-ATACA-AAAAA-  
TTAGCTGGGCATGGTGGCGCGTGCCTGTAATCCCAGCTACTCAGGAGGCTGAGGCAGGAGAATTGCCTGAACCCA  
GGAGGCGGAGGTTGCGGTGAGCCGAGATCGCGCCATTGCACTCCAGCCTGGG-----TA--  
AAGAGCGAAACTCCGTCTCA-----

>subfamily18\_Owl#SINE/Alu

-GCCGGGCGCGGTGGCTCAAGCCTGTAATCCCAGCACTTTGGGAGGCCGAGGCGGGTGGAT-CAC--  
GAGGTCAAGAGATCGAGACCA-TCCTGGTCAACATTGTGAAACCCCGTCTCTACT---A-ATAAA-  
AAAAAATTAGCTGGGCATGGTGGCGCGTGCCTGTAATCCCAGCTACTCAGGAGGCTGAGGCAGGAGAATTGCCT  
GAACCCAGGAGGCGGAGGTTGCGGTGAGCCGAGATCGCGCCATTGCACTCCAGCCTGGG-----TA-  
CAAGAGCGAAACTCCGTCTCA-----

>subfamily10\_Owl#SINE/Alu

-GCCGGGCGCGGTGGCTCACGCCTGTAATCCCAGCACTTAGGGAGGCGGAGGCGGGTGGAT-CAC--  
GAGGTCAAGAGATCGAGACCA-TCCTGGTCAACATGGTGAAACCCCGTCTCTACTAAAA-ATACA-A-  
AAAATTAGCTGGGCATGGTGGCGCGTGCCTGTAATCCCAGCTACTCAGGAGGCTGAGGCAGGAGAATTGCCTGA  
ACCCAGGAGGCGGAGGTTGCGATGAGCCGAGATCGCGCCATTGCACTCCAGCCTGGG-----  
CAACAAGAGCGAAACTCCGTCTCA-----

>subfamily17\_Owl#SINE/Alu

-GCCGGGCGCGGTGGCTCAAGCCTGTAATCCCAGCACTTTGGGAGGCGGAGGCGGGTGGAT-CAC--  
GAGGTCAAGAGATCGAGACCA-TCCTGGTCAACATTGTGAAACCCCGTCTCTACT---A-ATACA-  
AAAAATTAGCTGGGCATGGTGGCGCGTGCCTGTAATCCCAGCTACTCAGGAGGCTGAGGCAGGAGAATTGCCT  
GAACCCAGGAGGCGGAGGTTGCGGTGAGCCGAGATCGCGCCATTGCACTCCAGCCTGGG-----  
TAACGAGAGCGAAACTCCGTCTCA-----

>subfamily23\_Owl#SINE/Alu

-GCCGGGCGCGGTGGCTCAAGCCTGTAATCCCAGCACTTTGGGAGGCGGAGGCGGGTGGAT-CAC--  
GAGGTCAAGAGATCGAGACCA-TCCTGGTCAACATGGTGAAACCCCGTCTCTACT---A-ATACA-AAAAA-  
TTAGCTGGGCATGGTGGCGCGTGCCTGTAATCCCAGCTACCCAGGAGGCTGAGGCAGGAGAATTGCCTGAACCCA  
GGAGGCGGAGGTTGCGGTGAGCCGAGATCGCGCCATTGCACTCCAGCCTGGG-----  
TAACGAGAGCGAAACTCCGTCTCA-----

>subfamily25\_Owl#SINE/Alu

-GCCGGGCGCGGTGGCTCAAGCCTGTAATCCCAGCACTTTGGGAGGCCAAGGCGGGTGGAT-CAC--  
GAGGTCAAGAGATCGAGACCA-TCCTGGTAAACATGGTGAAACCCCGTCTCTACT---A-ATACA-AAAAA-  
TTAGCTGGGCATGGTGGCGCGTGCCTGTAATCGCAGCTACTCAGGAGGCTGAGGCAGGAGAATTGCCTGAACCC  
AGGAGGCGGAGGTTGCGGTGAGCCGAGATCGCGCCATTGCACTCCAGCCTGGG-----  
TAACAAGAGCGAAACTCCGTCTCA-----

>subfamily24\_Owl#SINE/Alu

GGCCGGGCGCGGTGGCTCAAGCCTGTAATCCCAGCACTTTGGGAGGCCGAGGCGGGTGGAT-CAC--  
GAGGTCAAGAGATCGAGACCA-TCCTGGTCAACATGGTGAAACCCCGTCTCTACTAA----TACA-A-  
AAAATTAGCTGGGCACGGTGGCGCGTGCCTGTAATCCCAGCTACTCAGGAGGCTGAGGCAGGAGAATTGCCTGA  
ACCCAGGAGGCGGAGATTGCGGTGAGCCGAGATCGCGCCATTGCGCTCCAGCCTGG-----  
TATCAAGAGCGAAACTCCGTCTCA-----

>subfamily19\_Owl#SINE/Alu

-GCCGGGCGCGGTGGCTCAAGCCTGTAATCCCAGCACTTTGGGAGGCCGAGGCGGGTGGAT-CAC--  
GAGGTGAGAGATCGAGACCA-TCCTGGTCAACATTGTGAAACCCCGTCTCTACT---A-ATACA-  
AAAAATTAGCTGGGCACGGTGGCGCGTGCCTGTAATCCCAGCTACTCAGGAGGCTGAGGCAGGAGAATTGCCT  
GAACCCAGGAGGCGGAGGTTGCGGTGAGCCGAGATCGCGCCATTGCACTCCAGCCTGGG-----  
TAACAAGAGCGAGACTCCGTCTCA-----

>subfamily9\_Owl#SINE/Alu

GGCCGGGCGCGGTGGCTCAAGCCTGTAATCCCAGCACTTTGGGAGGCCGAGGCGGGTGGAT-CAC--  
GAGGTGAGAGATCGAGACCA-TCCTGGTCAACATTGTGAAACCCCGTCTCTATT---A-ATACA-

AAAAAATTAGCTGGGCACGGTGGCGCGTGCCTGTAATCCCAGCTACTCAGGAGGCTGAGGCAGGAGAATTGCCT  
GAACCCAGGAGGCGGAGGTTGCGGTGAGCCGAGATCGCGCCATTGCACTCCAGCCTGGG-----  
TAACAAGAGCGAGACTCCGTCTCA-----
